# Supplementary material for: Ectocytosis prevents accumulation of ciliary cargo in C. elegans sensory neurons
Source: eLife journal article supplement (doi:10.7554/elife.67670), 2021-09-17

**A****ASER::TSP-7::wrmScarlet ; AMsh::CFP**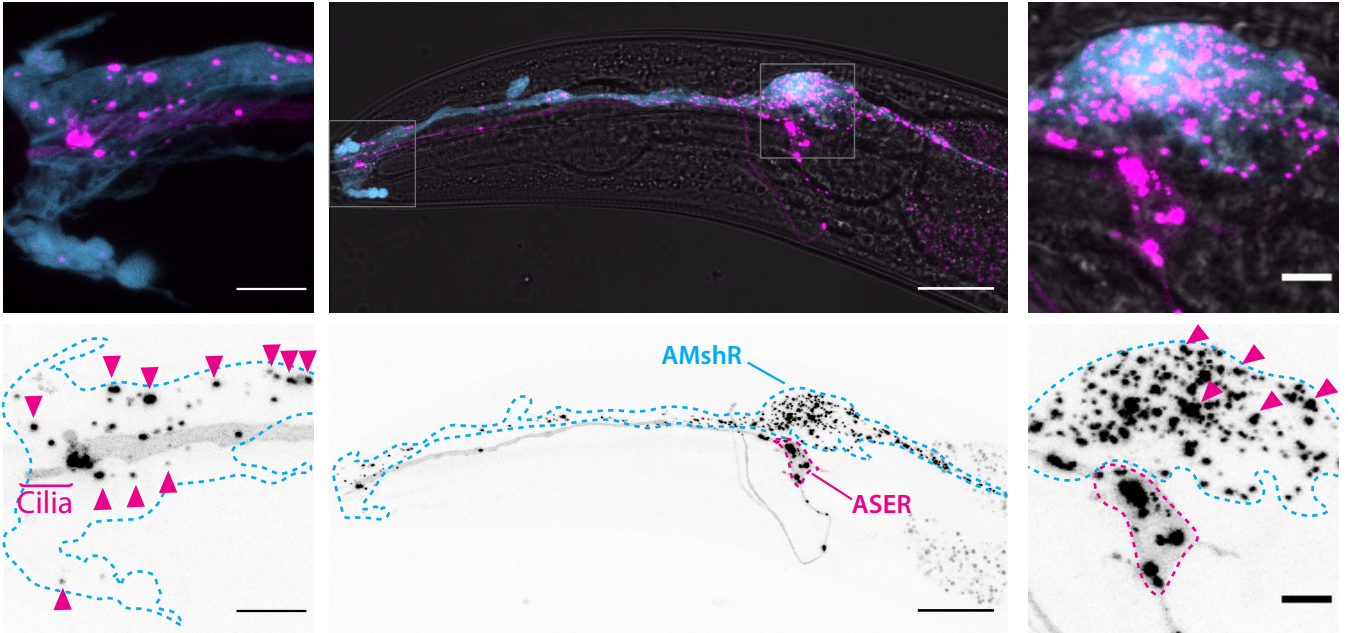**B** **OCR-2p::XBX-1::mEGFP** **OCR-2p::TSP-7::wrmScarlet**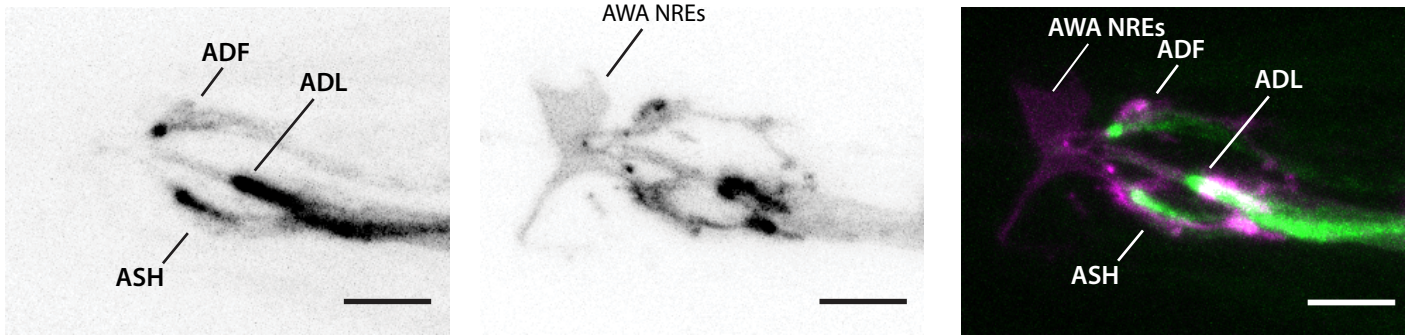**B'****OCR-2p::TSP-7::wrmScarlet ;**  
**OCR-2p::XBX-1::mEGFP**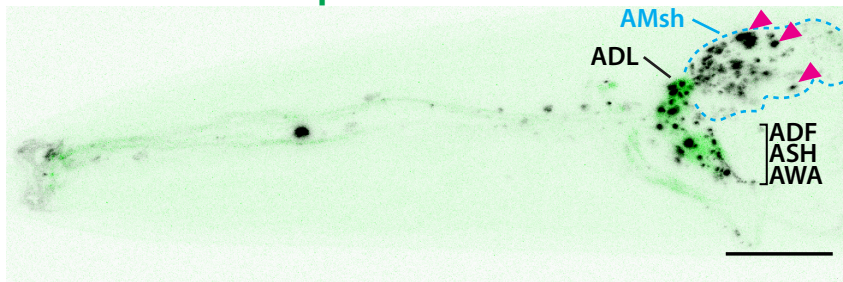**C****IL2::TSP-7::wrmScarlet ;**  
**IL2::mEGFP**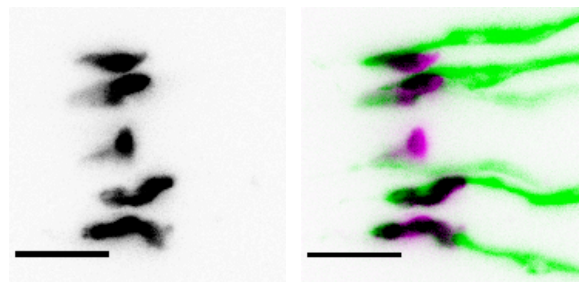**C'****IL2::TSP-7::wrmScarlet ; IL2mEGFP**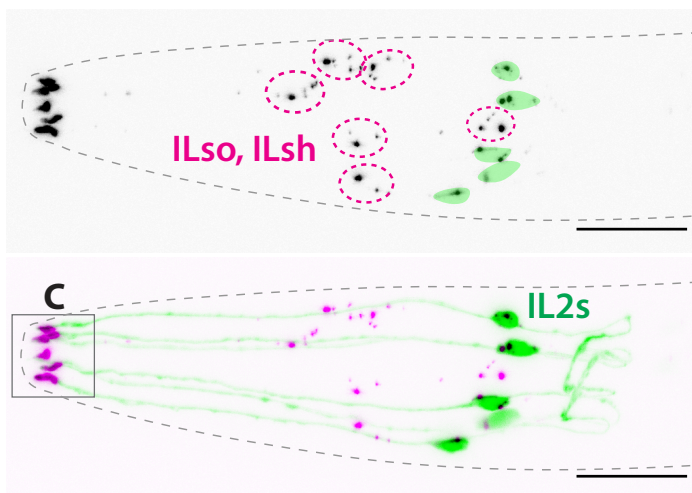**D****IL2::mCherry**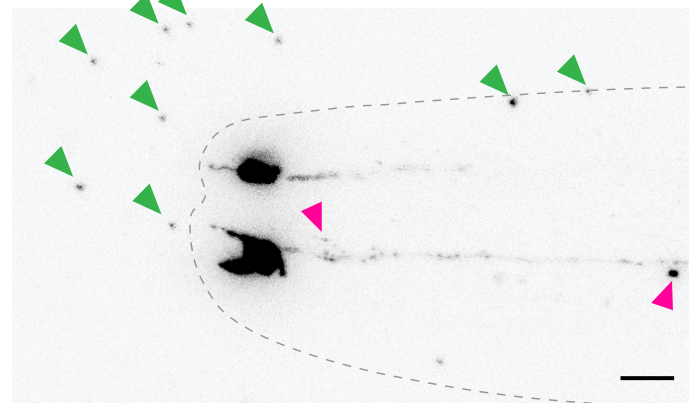

Supplement: supp [file elife-67670-supp-v1.zip]
