# Supplementary material for: Ectocytosis prevents accumulation of ciliary cargo in C. elegans sensory neurons
Source: eLife journal article supplement (doi:10.7554/elife.67670), 2021-09-17

A

AMsh::CFP

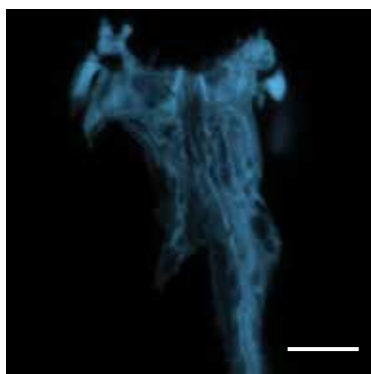

AFD::TSP-7::wrmScarlet

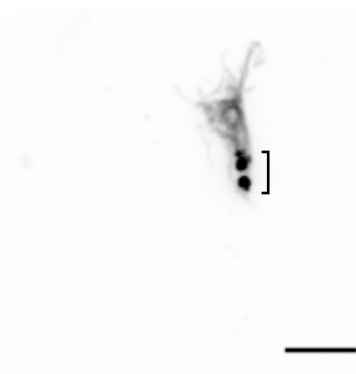

Non saturated

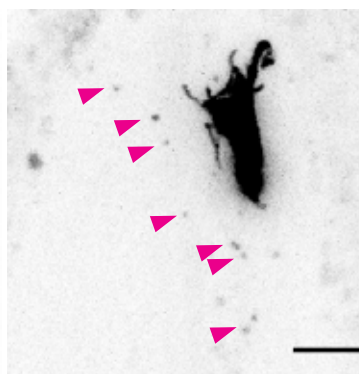

Digitally saturated

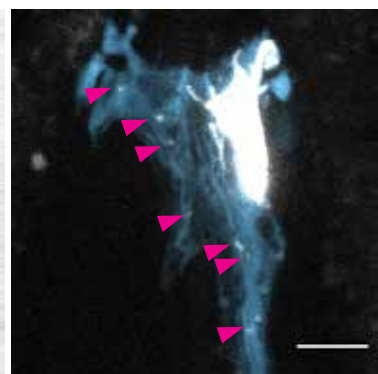

B

AFD::TSP-7::wrmScarlet

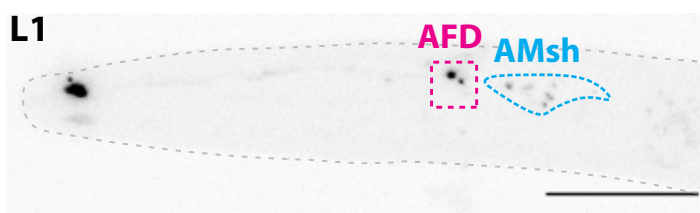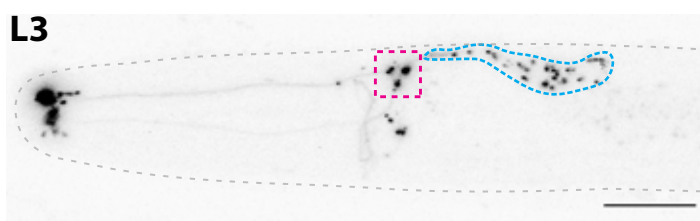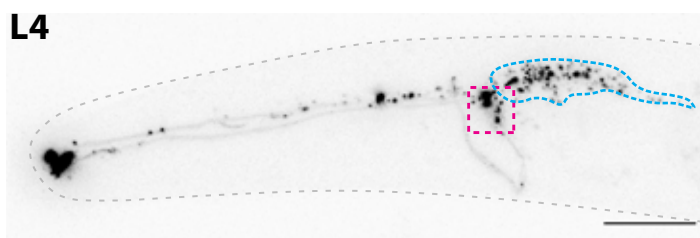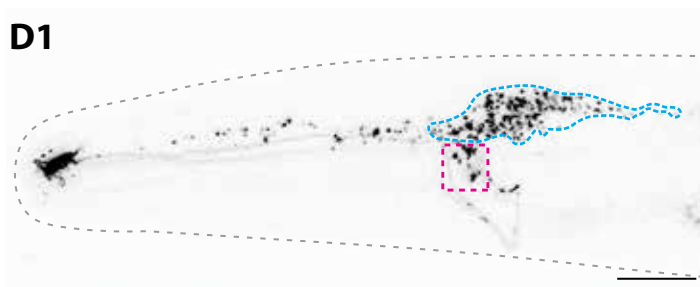

TSP-7::wrmScarlet ; AMsh::CFP

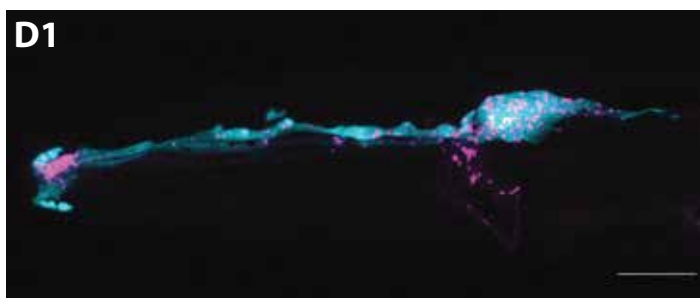

Supplement: supp [file elife-67670-supp-v1.zip]
