# Supplementary material for: Ectocytosis prevents accumulation of ciliary cargo in C. elegans sensory neurons
Source: eLife journal article supplement (doi:10.7554/elife.67670), 2021-09-17
Supplement: supp [file Figure 1 - Source Data 1F.xlsx]

## Sheet: CTCF Neuron Fluo Intensity
	M9 >M9+DiI >imaging				M9 >AZ +DiI >imaging
t0	333.28	620.04	526.75		74.1	51.91	24.84	22.96
1h recovery	988.62	961.9			148.93	127.6	106.12	101.45
