# Supplementary material for: Ectocytosis prevents accumulation of ciliary cargo in C. elegans sensory neurons
Source: eLife journal article supplement (doi:10.7554/elife.67670), 2021-09-17
Supplement: supp [file Figure 1 - Source Data 1G - Glia to Neuron Ratio.xlsx]

## Sheet: Glia to Neuron DiI ratio
	M9 >M9+DiI >imaging				M9 >AZ +DiI >imaging
t0	0.25952	0.164844	0.0818234		0.028831	-0.0337797	0.0231378	-0.0081527
1h recovery	0.106391	0.194124			0.298077	0.267568	0.479459	0.364521
