# Supplementary material for: Ectocytosis prevents accumulation of ciliary cargo in C. elegans sensory neurons
Source: eLife journal article supplement (doi:10.7554/elife.67670), 2021-09-17
Supplement: supp [file Figure 2 - Source Data 2C.xlsx]

## Sheet: Sheet1
Cilia	PCMC	Dendrite
31.0584	68.7883	0.531666
7.84051	11.7681	1.44134
12.6904	5.84079	1.16471
12.9948	11.8947	0.231887
29.3561	25.9302	5.81987
11.8917	37.9429	0.453812
11.6596	12.831	0.505905
23.5575	62.6198	0.15421
10.6742	83.2673	1.37461
24.7894	15.5284	-0.478392
38.626	13.4426	2.35561
6.81619	60.1347	0.213095
34.5883	60.8925	0.929051
9.10172	38.5309	0.0174986
13.4742	93.9539	0.443329
44.9214	55.8427	0.169048
62.1984	28.2442	0.661125
44.1987		0.661474
23.3294		2.14527
46.5088		0.408198
23.8575		0.475531
