# Supplementary material for: Ectocytosis prevents accumulation of ciliary cargo in C. elegans sensory neurons
Source: eLife journal article supplement (doi:10.7554/elife.67670), 2021-09-17
Supplement: supp [file Figure 4 - Source Data 4D.xlsx]

## Sheet: Cilia length (um)
N2	osm-3(p802)	che-3(cas511)	bbs-8(nx77)
4.931	3.174	3.522	6.914
3.578	3.253	0.515	5.808
3.509	2.535	0	3.58
3.893	3.388	0.532	4.904
3.299	3.53	2.119	7.166
3.872	3.003	0.329	5.201
4.06	3.065	0.477	4.445
4.225	3.259	0.229	5.441
3.813	3.121	0.928	7.943
4.365	3.639	0.614	4.445
3.717	3.496	0.53	2.56
3.895	2.718	0.646	5.065
5.112	1.872	1.26	5.803
4.283	2.12	0	4.567
3.399	2.896	0	6.733
4.373	3.105	0.193	5.434
3.799	2.512	0	6.084
3.89	2.992	0.452	6.842
4.391	2.841	2.94	6.138
4.072	3.055	0	3.603
3.661	2.745	1.407	5.81
3.098	3.092	0	6.125
2.973	2.632	1.039	3.55
3.181	2.961	0	5.204
3.748	2.482	0	3.822
4.115	2.615	0.737	5.152
4.142	3.428		2.834
2.662	2.32		4.777
3.083	2.273		5.038
4.175	2.441		4.112
3.187			5.419
4.303			5.715
3.849			3.917
5.092
4.103
4.436
4.196
3.811
3.265
3.07
2.812
3.757
3.405
3.897
2.614
3.324
