# Supplementary material for: Ectocytosis prevents accumulation of ciliary cargo in C. elegans sensory neurons
Source: eLife journal article supplement (doi:10.7554/elife.67670), 2021-09-17
Supplement: supp [file Figure 4 - Source Data 4J.xlsx]

## Sheet: bbs-8 Linescan quantification
Relative position in X	GCY-22-GFP			mKate
	Mean	SD	N	Mean	SD	N
-8.1888	2.97132	0.889472	29	0.341931	0.889472	29
-8.1069	3.06156	1.19043	29	0.338945	1.19043	29
-8.025	3.2132	1.50802	29	0.370224	1.50802	29
-7.9431	3.31731	1.84809	29	0.38488	1.84809	29
-7.8612	3.44042	2.30588	29	0.375643	2.30588	29
-7.7793	3.71397	2.79972	29	0.421361	2.79972	29
-7.6975	3.9569	3.45253	29	0.471809	3.45253	29
-7.6156	4.34208	4.27351	29	0.506515	4.27351	29
-7.5337	4.75835	4.49837	29	0.569471	4.49837	29
-7.4518	4.93896	4.49764	29	0.583732	4.49764	29
-7.3699	5.33561	4.75814	29	0.672492	4.75814	29
-7.288	5.94299	5.64666	29	0.767393	5.64666	29
-7.2061	6.6377	6.98959	29	0.796988	6.98959	29
-7.1242	7.25259	8.50854	29	0.865982	8.50854	29
-7.0424	7.86191	9.84575	29	0.88606	9.84575	29
-6.9605	8.35549	11.0188	29	0.958002	11.0188	29
-6.8786	9.02833	12.1123	29	1.05728	12.1123	29
-6.7967	9.60794	12.2448	29	1.18531	12.2448	29
-6.7148	9.71829	11.8643	29	1.27464	11.8643	29
-6.6329	9.49104	10.9069	29	1.28831	10.9069	29
-6.551	9.16399	9.33869	29	1.39085	9.33869	29
-6.4691	8.97268	8.36983	29	1.45432	8.36983	29
-6.3873	8.86843	7.61389	29	1.52039	7.61389	29
-6.3054	8.95427	7.40347	29	1.54493	7.40347	29
-6.2235	9.63097	7.89146	29	1.69725	7.89146	29
-6.1416	10.3905	8.84264	29	1.83872	8.84264	29
-6.0597	11.187	10.2417	29	1.87884	10.2417	29
-5.9778	12.016	11.6034	29	1.94936	11.6034	29
-5.8959	13.0523	12.9368	29	2.04218	12.9368	29
-5.814	13.6975	14.1709	29	2.0579	14.1709	29
-5.7321	14.3015	15.0516	29	2.09825	15.0516	29
-5.6503	14.847	15.4182	29	2.12666	15.4182	29
-5.5684	15.0673	14.8761	29	2.15282	14.8761	29
-5.4865	15.1424	13.9168	29	2.2209	13.9168	29
-5.4046	14.8176	13.5473	29	2.22787	13.5473	29
-5.3227	14.5368	13.6311	29	2.29001	13.6311	29
-5.2408	14.3317	14.54	29	2.264	14.54	29
-5.1589	14.027	15.3187	29	2.33665	15.3187	29
-5.077	13.8694	15.9603	29	2.33741	15.9603	29
-4.9952	13.633	15.7749	29	2.38674	15.7749	29
-4.9133	13.3332	14.4867	29	2.32021	14.4867	29
-4.8314	12.9706	12.663	29	2.40408	12.663	29
-4.7495	12.774	11.2501	29	2.49351	11.2501	29
-4.6676	12.8929	10.4504	29	2.61812	10.4504	29
-4.5857	12.7162	10.0627	29	2.58027	10.0627	29
-4.5038	12.6228	9.78856	29	2.69138	9.78856	29
-4.4219	12.6008	10.0838	29	2.83286	10.0838	29
-4.3401	12.6407	10.3298	29	2.88853	10.3298	29
-4.2582	12.6483	10.5359	29	2.85502	10.5359	29
-4.1763	12.4901	10.4187	29	2.95146	10.4187	29
-4.0944	12.608	10.5117	29	3.04216	10.5117	29
-4.0125	12.5941	10.6509	29	3.0249	10.6509	29
-3.9306	12.3086	10.4861	29	2.98167	10.4861	29
-3.8487	11.9485	10.1602	29	2.99773	10.1602	29
-3.7668	11.4796	9.53342	29	3.07583	9.53342	29
-3.685	11.1973	9.51387	29	3.07193	9.51387	29
-3.6031	10.8569	9.40561	29	3.05383	9.40561	29
-3.5212	10.283	8.60049	29	3.1468	8.60049	29
-3.4393	9.88693	7.99194	29	3.08379	7.99194	29
-3.3574	9.37392	6.72483	29	2.91054	6.72483	29
-3.2755	9.04465	5.60664	29	2.93856	5.60664	29
-3.1936	8.583	5.00951	29	2.80875	5.00951	29
-3.1117	8.35142	4.95697	29	2.75899	4.95697	29
-3.0298	8.41444	5.96925	29	2.79626	5.96925	29
-2.948	8.22092	6.34453	29	2.86058	6.34453	29
-2.8661	8.14479	6.24093	29	2.87751	6.24093	29
-2.7842	8.31863	6.17036	29	2.8768	6.17036	29
-2.7023	8.02722	5.31053	29	2.91789	5.31053	29
-2.6204	7.82568	4.20303	29	2.98873	4.20303	29
-2.5385	7.81212	3.82818	29	2.99982	3.82818	29
-2.4566	7.79888	3.67768	29	3.09258	3.67768	29
-2.3747	7.76781	3.49934	29	3.22438	3.49934	29
-2.2929	7.90092	3.52086	29	3.29671	3.52086	29
-2.211	8.07436	3.45678	29	3.40196	3.45678	29
-2.1291	8.18975	3.50451	29	3.40613	3.50451	29
-2.0472	8.32216	3.59618	29	3.40338	3.59618	29
-1.9653	8.58865	3.82457	29	3.4829	3.82457	29
-1.8834	8.77941	3.94726	29	3.60218	3.94726	29
-1.8015	8.93436	4.10563	29	3.75651	4.10563	29
-1.7196	9.14754	4.12788	29	3.82913	4.12788	29
-1.6378	9.33549	4.32287	29	3.81655	4.32287	29
-1.5559	9.42283	4.61547	29	3.97853	4.61547	29
-1.474	9.5914	4.97128	29	4.06679	4.97128	29
-1.3921	9.81674	5.23474	29	4.19794	5.23474	29
-1.3102	10.1015	5.2951	29	4.36271	5.2951	29
-1.2283	10.2718	5.39373	29	4.46441	5.39373	29
-1.1464	10.4725	5.43929	29	4.62063	5.43929	29
-1.0645	10.709	5.71845	29	4.65722	5.71845	29
-0.9827	10.7428	5.80264	29	4.86518	5.80264	29
-0.9008	10.7866	5.66959	29	4.96972	5.66959	29
-0.8189	10.7227	5.36716	29	5.04155	5.36716	29
-0.737	10.7541	5.15661	29	5.17146	5.15661	29
-0.6551	10.524	4.7646	29	5.29019	4.7646	29
-0.5732	10.451	4.52216	29	5.40636	4.52216	29
-0.4913	10.3276	4.39841	29	5.47517	4.39841	29
-0.4094	10.1834	4.34896	29	5.42883	4.34896	29
-0.3276	10.1426	4.41882	29	5.50921	4.41882	29
-0.2457	10.0129	4.36299	29	5.65366	4.36299	29
-0.1638	10.4639	4.5883	29	5.79703	4.5883	29
-0.0819	11.1355	5.12015	29	6.12928	5.12015	29
0	12.144	6.10227	29	6.27905	6.10227	29
0.0819	13.8721	8.18569	29	6.59565	8.18569	29
0.1638	16.2499	10.7732	29	7.29348	10.7732	29
0.2457	18.9955	13.5484	29	7.94021	13.5484	29
0.3276	21.5963	15.5988	29	8.72268	15.5988	29
0.4094	24.0773	17.0965	29	9.64392	17.0965	29
0.4913	27.2416	19.144	29	10.7413	19.144	29
0.5732	29.8861	20.8198	29	11.961	20.8198	29
0.6551	32.0422	22.3602	29	13.3324	22.3602	29
0.737	33.3332	22.8706	29	14.3078	22.8706	29
0.8189	34.0517	22.9772	29	15.3611	22.9772	29
0.9008	34.2105	23.2135	29	16.1661	23.2135	29
0.9827	34.2032	23.1941	29	16.7082	23.1941	29
1.0645	34.1937	22.9327	29	17.2083	22.9327	29
1.1464	33.2185	21.521	29	17.5588	21.521	29
1.2283	32.2795	20.2445	29	17.9016	20.2445	29
1.3102	30.7212	18.8543	29	18.2506	18.8543	29
1.3921	29.0381	17.7064	29	18.3732	17.7064	29
1.474	27.5899	17.2947	29	18.5465	17.2947	29
1.5559	26.1314	16.5169	29	18.9253	16.5169	29
1.6378	24.9453	15.9907	29	19.3481	15.9907	29
1.7196	24.1752	15.9716	29	19.9241	15.9716	29
1.8015	23.3114	15.8077	29	20.5464	15.8077	29
1.8834	22.9158	16.0678	29	21.2052	16.0678	29
1.9653	22.7422	16.5319	29	21.871	16.5319	29
2.0472	22.9092	17.1671	29	22.5782	17.1671	29
2.1291	22.4222	17.1562	29	22.8548	17.1562	29
2.211	22.4149	17.8966	29	23.3364	17.8966	29
2.2929	22.2248	18.1304	29	23.8364	18.1304	29
2.3747	21.6672	18.1426	29	24.0292	18.1426	29
2.4566	21.2821	18.2041	29	24.2487	18.2041	29
2.5385	20.517	17.4587	29	24.2862	17.4587	29
2.6204	19.6307	15.9187	29	24.0759	15.9187	29
2.7023	18.5193	14.7927	29	23.9956	14.7927	29
2.7842	17.5844	14.7446	29	23.7443	14.7446	29
2.8661	16.5353	15.5941	29	22.6401	15.5941	29
2.948	16.0892	16.4275	29	22.6458	16.4275	29
3.0298	15.2189	16.6787	29	22.5157	16.6787	29
3.1117	14.4185	17.4366	29	22.2135	17.4366	29
3.1936	13.9776	18.3274	29	21.8111	18.3274	29
3.2755	13.1714	18.5167	29	21.9853	18.5167	29
3.3574	12.4394	17.1207	29	22.0125	17.1207	29
3.4393	11.3661	14.6562	29	21.6629	14.6562	29
3.5212	10.2181	12.1804	29	21.4001	12.1804	29
3.6031	9.21809	10.0646	29	21.1536	10.0646	29
3.685	8.6056	8.54982	29	21.471	8.54982	29
3.7668	7.98316	7.23604	29	21.4493	7.23604	29
3.8487	7.63815	6.74318	29	21.1186	6.74318	29
3.9306	7.33709	5.69107	29	21.3832	5.69107	29
4.0125	6.87372	4.16324	29	20.8761	4.16324	29
4.0944	6.38321	3.07553	29	20.6661	3.07553	29
4.1763	5.98257	2.26975	29	20.4428	2.26975	29
4.2582	5.87274	1.92952	29	19.5992	1.92952	29
4.3401	5.77751	1.71664	29	19.7349	1.71664	29
4.4219	5.57276	1.49175	29	19.4411	1.49175	29
4.5038	5.52887	1.38446	29	20.2389	1.38446	29
4.5857	5.52758	1.27378	29	20.7181	1.27378	29
4.6676	5.67907	1.06451	29	21.8204	1.06451	29
4.7495	5.62712	1.13305	29	21.2874	1.13305	29
4.8314	5.60371	1.18045	29	21.1463	1.18045	29
4.9133	5.59192	1.10357	29	20.7732	1.10357	29
4.9952	5.64262	1.11532	29	22.1092	1.11532	29
5.077	5.36706	0.923128	29	20.8363	0.923128	29
5.1589	5.60979	1.02375	29	21.0055	1.02375	29
5.2408	5.47047	0.980327	29	19.3831	0.980327	29
5.3227	5.46109	1.06379	29	19.204	1.06379	29
5.4046	5.41704	1.00793	29	20.9075	1.00793	29
5.4865	5.70014	1.16945	29	21.2039	1.16945	29
5.5684	5.55004	1.19139	29	21.8532	1.19139	29
5.6503	5.52497	1.18503	29	21.5432	1.18503	29
	5.66496	1.03995	29	22.0192	1.03995	29
	5.66104	1.00919	29	22.5112	1.00919	29
	5.51949	1.03262	29	22.1344	1.03262	29
	5.52553	1.15481	29	22.4578	1.15481	29
	5.43805	1.00486	29	22.1068	1.00486	29
	5.15492	0.78035	29	19.3464	0.78035	29
	5.2029	0.946027	29	19.7781	0.946027	29
	5.18608	0.970085	29	19.7094	0.970085	29
	5.14812	0.925209	29	19.4492	0.925209	29
	5.3605	0.976836	29	21.5418	0.976836	29
	4.96853	0.894089	29	19.6055	0.894089	29
	5.11037	0.965085	29	19.7107	0.965085	29
	5.22643	0.915863	29	19.324	0.915863	29
	5.18333	0.887407	29	19.0372	0.887407	29
	5.16007	0.907357	29	19.1704	0.907357	29
	4.92717	1.21697	29	19.2348	1.21697	29
		1.55585			1.55585
		1.23652			1.23652
		1.17316			1.17316
		1.02601			1.02601
		0.942856			0.942856
		0.461387			0.461387
		0.602243			0.602243
		0.501339			0.501339
		0.859983			0.859983
		0.953746			0.953746
		0.759362			0.759362
		0.812536			0.812536
		1.30596			1.30596
		1.50989			1.50989
		1.43741			1.43741
		1.20222			1.20222
		1.67556			1.67556
		1.72287			1.72287
