# Supplementary material for: Ectocytosis prevents accumulation of ciliary cargo in C. elegans sensory neurons
Source: eLife journal article supplement (doi:10.7554/elife.67670), 2021-09-17
Supplement: supp [file Figure 5 - Source Data - Supplement_1C.xlsx]

## Sheet: # of Basal EVs
N2	osm-3(p802)	che-3(cas511)	bbs-8 (nx77)
2	7	8	6
2	4	5	3
0	10	5	4
0	3	7	2
0	7	11	5
0	4	7	2
1	8	3	4
3	9	12	3
2	5	10	11
1	7	8	7
1	6	3	1
0	7	6	5
2	4	10	6
0	3	5	3
1	10	7	7
2	11	3	3
1	5	6	4
1	9	5	2
1	12	16	4
1	5	8	2
0	8	9	2
0	6	9	0
0	8	8	3
1	5	6	5
1	5	9	7
0	9
	9
	5
	10
