# Supplementary material for: Ectocytosis prevents accumulation of ciliary cargo in C. elegans sensory neurons
Source: eLife journal article supplement (doi:10.7554/elife.67670), 2021-09-17
Supplement: supp [file Figure 5 - Source Data 5E.xlsx]

## Sheet: # of Apical EVs
N2	osm-3(p802)	che-3(cas511)	bbs-8 (nx77)
1	1	1	0
1	1	1	3
5	1	0	6
2	1	1	10
2	0	0	4
1	2	1	3
0	2	0	2
0	1	0	11
6	1	1	2
1	3	0	0
3	1	0	3
0	1	1	7
0	1	1	3
1	0	0	2
0	1	0	8
1	2	5	2
3	2	0	3
1	1	1	6
2	2	0	2
1	1	0	3
0	3	1	6
1	0	0	5
1	1	1	2
1	1	3	1
1	3	0	0
2	2
	4
	3
	3
