# Supplementary material for: Ectocytosis prevents accumulation of ciliary cargo in C. elegans sensory neurons
Source: eLife journal article supplement (doi:10.7554/elife.67670), 2021-09-17
Supplement: supp [file Figure 5 - Source Data 5F.xlsx]

## Sheet: # of vesicles in AMsh
N2	bbs-8 (nx77)	osm-3 (p802)	che-3 (cas511)
118	80	235	231
5	129	255	191
76	216	260	205
87	169	127	272
76	302	165	220
66	190	311	315
71	197	270	167
69	192	195	309
68	144	309	295
19	185	299	240
32	211	211	380
40	117	342	242
82	180	270	242
19	155	253	193
62	189	281	262
61	121	171	355
55	192	251	262
119	207	289	258
51	142	269	322
13	152	364	150
65	140	274	297
69	271	296	299
17	81	421	231
41	195	252	265
57	208	273
64	127	250
78	103	253
87		324
53		345
58		321
