# Supplementary material for: Ectocytosis prevents accumulation of ciliary cargo in C. elegans sensory neurons
Source: eLife journal article supplement (doi:10.7554/elife.67670), 2021-09-17
Supplement: supp [file Figure 5 - Source Data_Supplement_2A.xlsx]

## Sheet: PCMC area (in squared um)
OEX. ASER::mKate	OEX. ASER::TSP-6	OEX. ASER::GCY-22	K.I. GCY-22::GFP ; N2	K.I. GCY-22::GFP ; osm-3 (p802)	K.I. GCY-22::GFP ; che-3 (cas511)
1.262	2.048	7.861	4.157	3.849	3.38
2.111	2.033	8.393	3.004	6.32	5.505
2.895	1.368	7.836	4.298	4.681	8.483
3.062	3.596	10.878	3.98	6.196	4.667
1.85	3.712	11.46	4.429	5.525	7.101
2.192	1.176	7.563	4.694	5.043	4.513
1.239	3.141	9.771	3.681	6.048	8.784
2.163	1.347	14.32	3.723	5.224	8.892
2.669	1.388	9.198	3.876	6.484	7.209
2.187	3.662	10.406	3.62	4.359	5.204
1.579	3.21	12.801	5.116	4.198	6.565
2.294	2.59	11.472	4.996	2.857	6.947
2.124	1.79	7.74	3.514	2.984	6.484
3.116	2.62	3.48	3.366	5.237	9.301
3.064	3.06	8.48	3.608	4.157	6.786
1.675	2.45	7.77	3.722	4.359	7.711
2.132	3.73	8.63	3.594	3.936	6.907
3.377	3.26	6.83	2.944	5.438	12.332
2.159	2.93	7.84	3.413	3.695	8.375
	4.76	8.07	3.038	3.983	5.66
	3.22	10.07	2.971	3.862	6.558
	2.61	6.32	4.459	4.506	9.515
	2.31	3.99	4.352	4.701	9.495
		6.25	5.183	4.909	8.355
		3.84	3.574	4.64	6.491
		8.16	3.976	5.418	8.469
		8.49	2.515	4.184
			3.634	4.949
			3.742	3.4
			3.024	4.486
			3.815
			3.339
			3.453
			2.588
			3.111
			2.26
