# Supplementary material for: Ectocytosis prevents accumulation of ciliary cargo in C. elegans sensory neurons
Source: eLife journal article supplement (doi:10.7554/elife.67670), 2021-09-17
Supplement: supp [file Figure 5 - Source Data_Supplement_2B.xlsx]

## Sheet: Vesicle diameter (in nm)
ASER::TSP-6 OEX	ASER::GCY-22 OEX	osm-3(p802) ; TSP-6::wrmScarlet Knock in	osm-3(p802) ; GCY-22::GFP Knock in
458.6	1204.9	299	579
488.6	1289.1	300	274
583.3	566.9	223	420
277.8	380.5	302	555
480.9	848.4	996	492
322	1194.3	402	333
405.5	1021.3	230	302
478.2	950	273	542
365	1718.9	195	608
421.1	727.7	337	496
386	1139.4	322	609
391.4	1348.6	375	452
444.2	796.5	390	511
414.3	1179.8	277	407
433.3	819	297	1149
442.5	1121.2	365	382
323.6	793.6	277	346
305.5	1455.4	304	366
449.7	679	494	299
423.9	910.1	406	345
554.5	795	401	1398
675	984.8	224	531
614.4		432	792
507.7		400	569
481.5		291	1286
373		294	558
380.8		284	709
444.4		313	496
456.2		327	458
409.1		478	281
499		327	333
367.1		595	258
387.6		259	1185
773.7		268	367
449.4		358
421.6		269
504.9		296
453.8		218
533.6		373
624.4		385
560.1		291
391		349
610		359
385.1		369
351.3		233
371.7		280
392.8		377
1134.6		411
446.1		426
444.5		249
379.4		501
378.2		241
574.3		341
410		273
356.4		346
694.6		290
441		298
449.8		304
539.6		375
423.8		494
448.6		427
649.6		290
247.2		274
428.6		364
409.8		424
617.3		246
867.6		386
325.9		408
338.2		409
474.1		387
434.3		430
388.2		513
548		242
345.1		353
483.3		319
519.1		187
315.3		167
488.5		334
351.5		364
683.7		321
381.3		273
530.8		369
390.6		304
459.6		308
341.3		217
271.8		255
620.6		581
561.5		259
420.7		385
375.5		500
518		411
365.5		253
306.4		382
351.5		258
451.5		244
418.8		181
698.3		304
508.2		236
329.9		485
478.4		414
325.1		245
359.1		176
601.6		194
334.5		406
362.9		424
482.7		366
427.8		366
365.2		197
547.5		440
695.8		387
237.8		270
324.7		337
428.9		369
356.2		459
371.3		347
390		244
356.2		169
346.3		438
340.9		246
473.8		349
831.4		390
484.8
391.8
358.5
534.1
474.4
466.4
420.2
679.3
554.9
433.8
497.9
467.7
357.5
456.9
408
331.4
291.1
370.8
387.8
599
453.3
521.6
540.1
427.4
591.3
340.5
526.8
487.6
441.9
