# Supplementary material for: Ectocytosis prevents accumulation of ciliary cargo in C. elegans sensory neurons
Source: eLife journal article supplement (doi:10.7554/elife.67670), 2021-09-17
Supplement: supp [file Figure 5 - Source Data_Supplement_2D.xlsx]

## Sheet: Vesicle Size (in nm)
TSP-6 alone	TSP-6 + GCY-22
368.821	377.626
363.038	712.697
434.664	437.363
422.943	439.568
338.433	245.41
509.145	737.477
458.099	579.595
411.043	281.011
507.972	331.348
392.61	215.297
259.514	345.618
308.196	530.217
589.292	501.582
591.406	388.391
419.378	484.502
413.67
339.102
295.192
328.024
291.637
298.885
351.965
283.186
264.464
265.302
587.689
606.884
348.34
360.746
269.825
291.434
235.006
166.43
271.768
310.385
368.909
285.816
467.117
243.209
295.863
257.204
191.083
294.464
419.789
236.377
273.167
250.102
276.425
285.816
