# Supplementary material for: Ectocytosis prevents accumulation of ciliary cargo in C. elegans sensory neurons
Source: eLife journal article supplement (doi:10.7554/elife.67670), 2021-09-17
Supplement: supp [file Figure 6 - Source Data 6B.xlsx]

## Sheet: # of vesicles in AMsh
N2	ttx-1(p676)
46	44
64	48
81	50
80	22
60	85
85	53
80	36
115	25
91	34
78	7
59	50
79	40
146	45
66	90
73	29
103	50
76	1
51	3
95	52
144	45
90	25
128	22
125	14
129	54
160	15
106	20
107	41
90	30
107	0
61	10
92	46
	41
	48
	26
	41
	75
	38
