# Supplementary material for: Ectocytosis prevents accumulation of ciliary cargo in C. elegans sensory neurons
Source: eLife journal article supplement (doi:10.7554/elife.67670), 2021-09-17
Supplement: supp [file Figure 6 - Source Data_Supplement_1A.xlsx]

## Sheet: Average Fluo intensity x Animal
N2	ttx-1(p676)
506.92	80.6
528.35	40.03
298.65	58.58
150.28	92.37
223.44	92.19
677.38	96.99
382.85	55.05
329.37	0.82
118.28	30.13
147.98	39.8
183.9	34.39
267.04	94.52
445.74	123.27
87.4	101.25
293.5	49.85
217.23	76.72
284.08	6.31
647.1	76.77
204.16	145.55
556.32	120.73
379.63	43.04
460.04	14.11
394.7	37.83
570.86	88.56
311.26	21
396.16	32.8
316.61	75.4
135.63	143.67
220.21	0
46.97	14.48
368.79	47.63
	58.92
	67.52
	24.65
	54.67
	181.65
	49.59
