# Supplementary material for: Ectocytosis prevents accumulation of ciliary cargo in C. elegans sensory neurons
Source: eLife journal article supplement (doi:10.7554/elife.67670), 2021-09-17
Supplement: supp [file Figure 6 - Source Data_Supplement_1B.xlsx]

## Sheet: Individual vesicle fluorescence
N2	ttx-1(p676)
284.6	16.33
468.286	104
205.2	254.67
1275	10.67
27.312	10.67
845.5	118
204.769	46.67
890	40.18
134.769	181.12
192.75	20
417.222	76.71
617.471	27
258.8	103.24
667.059	71.63
717.344	168.12
432.562	8.33
482.156	144.34
32.333	85
58.062	176.59
293.154	71.78
110.167	117
183.2	28
2607	26.21
1703.33	141.57
1041.47	113.43
714	31.92
310.571	12.82
239.429	372.95
116.75	137
240.458	88
1305.17	72.25
52.292	33.45
430.25	94.14
192	107.03
27.125	124.53
123.75	17.45
522	52.79
39.8	46.62
355.75	55.57
554.286	25.85
1179	55.79
761.6	34
816	99.14
782.5	33
100.818	46
305.286	6.19
844.6	61.31
409.6	32.97
634.844	53.75
156.923	18.55
138.846	7.31
599.2	14.36
113.458	38
145.75	7.67
259.286	9
1011.33	36
159.455	97.5
1022.33	18.29
1342.18	89.67
401.75	113.4
350.094	13.82
1182.67	5
193.083	53.77
552	71.5
642.4	11.4
809.222	38.6
473.2	9.2
94.542	25.4
52.333	17
794.429	83.88
1455	9
167.875	4.6
678.4	9.88
148.6	26.92
75.25	127.8
160	75.44
1250.88	56.54
1258.65	18.13
234.5	79.43
673.5	129
229.857	18.27
2610.71	40.86
762.529	17.82
285.714	21
879	4.44
302.308	27.08
23.333	84.15
398.5	53
219.429	4.67
637.632	25.92
638	32.75
141.636	16.33
43.188	26
1442.42	63.23
22.875	7
236.923	117.8
147.8	46.69
186.538	14
421	121.86
447.906	46.91
40.667	131.76
838.375	18
73.6	144
2990.5	122.6
370.917	303.76
353	108.5
5	27.55
18.4	5.19
405	12.5
155.429	8.6
534.444	179.34
213.25	108.29
19.417	25.8
132.609	45.88
36.154	63.75
22.2	34.18
8.375	81.29
123.895	15.2
6	74.43
13.333	315.25
85.25	7.6
129.842	9.67
93.292	27.45
33.455	14.67
150	24
37	0.38
126.5	20.5
8.938	27
459.647	4.88
177.588	24.38
16.5	31.73
275	46.43
1496.36	73.71
71.846	57.15
23.455	77.43
73.8	16.64
172.769	20.91
641.5	9
44.235	161.5
171.118	237
20.812	91.8
168.308	20.09
424	110.85
92	92.2
174.154	299.57
233.5	13
75.143	31.8
26.4	129.71
91.231	9.75
1017.75	88.75
217.75	51.38
21.8	38.88
79	65.75
186.6	247
379.391	14.8
189.719	107.5
52.4	147.8
123.4	35.45
172.412	80.25
18.636	66.08
50.458	75
488.529	119.33
85.308	53.75
203.706	132
29.308	37.18
108.154	51.2
101	172.6
268.529	32.4
101	172.28
67.636	364.6
394.118	186
2125.28	65.4
82.042	97.15
494	40.45
23.333	8.31
71.909	64.54
323.5	178
55.958	29.92
722.062	72.69
181	154.53
134	56.75
44.091	63.14
838.75	36.71
986.286	56.31
12.333	12.27
522.562	61.75
6192	71
42.538	12.45
69.333	15.4
180.667	51.42
29.4	14.67
3.562	148.24
117.219	39.15
58.667	563.4
9	19.6
82.588	10.67
170	13.81
41.714	23.45
76	10.33
0.00025	130.5
7.6	43.58
215.031	176.95
208.647	436.4
52.154	6
60.688	17.6
438.111	16
52.385	37.77
63	72.25
55	139
139.231	41.88
12.125	20.6
54.615	28.45
57.615	135.29
27.2	7
153.75	58
28.4	44.55
382.842	170.25
10.333	64.43
93.917	25.27
158	130.65
378.4	50.46
39.364	227
8.444	158.94
60.417	5.13
230.8	267.47
77.077	34
34.769	77.63
435.647	62.18
411	16.13
142.412	135.65
974.609	183.25
42.4	82.25
15.6	22
173	51.09
342.854	22
168.684	33.13
12.333	87.42
201.737	73.5
61	148.85
59.429	102.5
151.714	213.8
260.438	73
90.154	173.59
75	32
11.562	246.2
468.5	90.71
141	23.4
109.462	17.8
39	253.57
88.364	82.91
7.062	73.04
18	178
40.909	72.92
401.059	68.36
65.25	18.44
162.8	211
501	61.83
512.889	103
154.25	57.09
274	327.53
346.75	47
109.538	33.6
135.769	310.82
313.158	15
18	175.14
9.812	281.67
8	34
21.688	390
676.824	5.06
22.545	253.84
88.556	22.2
165.156	203.6
7.8	46
23.818	44.92
184.725	63.86
468.4	64.27
62.25	62.31
8	237.35
85.4	20.06
1036	86
382.529	25.55
38.455	7.13
100.667	103.69
21.692	200.75
144.25	73.79
147.2	17.67
20.462	138.86
65.25	43.79
12.333	79.67
343.529	48
97.042	35.91
151.625	69.62
117.542	58.31
298.5	25.2
535.818	16.27
39.571	5.88
389.333	467.43
120.75	143
62	39.75
11.429	95.67
138.571	10
264.5	10.67
18.727	88.57
1312.6	70.15
12.4	48.75
110.5	9
64.846	38.71
12.333	19.64
989.947	64.2
62	52
77.462	34.27
117.143	14.2
11	37
86.769	6.75
26.308	44
119.4	28.8
282.105	58.69
22.909	37.5
376	82.23
914.455	43.5
6	17.67
36.455	5.67
252.882	6.19
9.333	15.55
660.818	106.77
593.9	5.06
652	56.33
459.2	57.75
245.333	32.36
319.176	50
9.75	68.54
62.8	34
1544.75	55.63
803	139.67
514.333	37.31
1746.82	12
25.727	19.8
794.5	53.2
249.042	18.5
900.2	62.25
250.25	23.45
1083	205.5
279	124.5
349	40.88
1661.2	3.31
3499.53	93.57
2135.95	11.8
55.333	10
126	0.11
1406.35	2.25
301.5	0.21
287.333	1.57
85	0.36
106.8	0.98
454.333	4.58
3041.79	0.32
36.8	0.43
1253.53	0.15
223.385	3.43
2687	2.55
589.4	0.08
319.6	0.67
390	0.36
151.909	2.6
79.545	0.9
147.545	0.45
261	0.14
2099.59	0.08
2726.36	0.54
119.333	0.6
276	0.09
807.105	0.13
28.8	0.35
132.308	0.28
116.846	0.17
317.636	0.7
389.462	0.35
254.647	0.66
1491	2.06
345	0.86
802	0.03
1919.5	0.2
162.636	0.06
1312.55	0.19
649	14.55
633	0.25
494.575	35.77
769.844	0.06
891	6.67
341.909	17.83
614.4	6.75
466.615	53
459.714	55.2
349.118	3.81
121.667	13.5
677.667	6.6
3.667	97.63
92.154	23
1122.47	59.5
18.091	12.33
33.333	19
504.7	5.67
124	155.14
490.737	109.29
417.263	9.19
936.895	21.71
835.889	11.27
151	11.8
1093.4	3.63
27.188	9.55
1763.71	44.86
960.5	27.71
319.308	15.2
257	43.54
267.231	7.88
486.5	63
1071.41	139.21
176.571	6.8
687.4	10
60.4	51.62
99.154	42.77
80.458	15.4
331.857	103.57
725.25	15.33
43.923	120.6
1243.47	32.83
207.538	11.4
321.8	16.09
46.6	22.6
24.2	14.5
657	13.6
20.6	70.4
2676.32	11
570.059	20.8
1025.77	17
84.333	6.31
302.231	22.75
537.6	107.4
194.143	20.19
58.231	69
549.8	53.5
108.25	23.36
577.857	103.33
373.906	16
273.353	16.45
595.87	10.4
2410.12	176.57
92.143	9
1739.5	174.03
173	16.36
569.412	12.38
411.579	47.77
286.75	28.5
793.455	27
18.667	6.38
128.75	18.2
573.429	11.33
289.647	21.08
87.8	13.82
145.286	44
571.353	11.88
80.462	70
544.6	16
610.333	21.63
128.167	129.55
158.8	7.19
338.412	217.41
188.667	12.2
111	18
52	6
222.706	15.4
24.5	46.65
97.462	56.5
45.083	20.64
720	15.8
197.364	68.32
107.857	27.67
212.769	11
497	5.75
498.2	17.2
313.714	38.71
134.75	89.5
219.077	29.54
226.5	30.79
230	9.2
159.719	23.64
110.462	19.55
20.091	1.06
375.235	10.5
398.471	34.18
201.8	10
135.857	12
79.75	32.67
171.5	9.94
413	13.6
586.6	17.64
316.706	80.4
94.5	29.92
71.545	17
246.571	6.44
162.2	11.38
45.182	24
295.594	215.44
258.6	21.38
430.333	147.71
51	67.15
207.176	160.8
809	51.75
1233.94	69.83
423.875	106.89
264.8	31.6
151.333	79
65.417	22.38
575.594	36.85
23	33
122.143	180
117.364	23
17.062	237.86
182.462	247.06
340.8	471.94
582.25	99.22
418.219	145
230.615	59.17
1359.62	11
482.176	97
108.154	18.73
115.308	11.6
426.4	18.8
290.5	6.06
17.667	187.89
786.522	109.18
355.176	17.73
93.083	15.8
144.923	171.2
282.2	22
253	193.57
102	59.23
13.875	73.08
40.818	133.41
163.667	92
77	55.5
463.938	18.2
13.667	108.2
861.281	428
21.8	141
102.857	54.54
128.5	352
228.25	56.55
120.429	8.31
19.333	226
514.6	682
478.325	104.67
13.312	360.75
88.2	28.27
1543	64.63
493.714	77.14
272.176	31
221.769	151.18
787.2	116.86
156	162.34
19.75	241.45
19.455	103.67
819.8	6.94
455.571	111.46
205.333	116.75
788.474	315
138	170.6
36.333	244.22
460.667	75
1496.44	53.29
161.462	192
116.125	42.75
359	23
284.562	68.6
1660.93	196.67
262.923	11.19
39.2	16.27
25.062	62.17
1107	6.19
477	39.82
74.909	44.91
875.375	90.5
111.714	37.82
141.571	34.58
26.455	15.33
526.2	23.18
936.5	73.5
88.781	88.38
38.938	49.29
1370.75	56.23
312.286	12.19
80.385	108.57
177.667	85.92
800.818	20.2
154	375.37
32.182	58.54
38.182	87.31
89.417	16
94	59.85
338.471	21.6
87.083	34.18
179.25	32
97.167	118.57
347.353	43
149.462	3.44
469.75	23.09
204.333	28
168.6	38.73
171.231	161
1127.22	198.67
256.8	185.18
16.6	116.54
14.6	42.67
8	246
276	45.64
190.6	29.4
172.525	384.65
78.692	121.46
75.5	53.08
15	109.75
94.656	9
112.474	19
104	139.15
7.667	74.43
85.462	40.83
55.5	90.67
166.545	30.5
94.25	294
7.312	53.4
58.75	149.54
161.286	23.8
391.647	264.2
5.667	34.33
35.875	43.4
205.2	22.46
148.522	90.77
38.545	45.67
511.176	36.88
197	11.33
40.182	70.45
177.5	20
125	9.5
10	24.8
171.286	195.25
253.412	334.35
60.917	98.38
81	416
25.042	173
97.25	133.4
13.667	60.08
236.652	430.76
12.438	72.21
467.182	325.45
269	16.5
20.455	15.56
194	94.31
195.4	228.6
9	158.14
84.6	77.88
102	90.46
130.923	12.56
164	12.67
34.75	9
42.083	35
6.812	132.2
73.077	250.34
100.75	18
241	51.5
204	142.2
84.5	80.92
13	18.33
117.571	112.67
39.583	251.43
30.667	214.25
10.625	101.71
62.615	6.31
30.615	11.56
97.75	39.25
182	6.75
45.455	46.58
87.571	97.59
39.231	36.09
16.667	163.71
10.75	105.25
23.333	12.8
1173.65	43.67
196.647	7.33
426.529	6.94
21.375	28.46
315.474	74.6
46	44.71
47	33.09
23.667	55.41
89.412	131.63
219.5	17.8
100.719	22.55
88.615	44.71
32	31.79
55.143	41.92
37	168.33
7	38.42
19	58.23
47	48.5
6.875	21.71
26.727	158.43
194	27.91
386.143	127.29
94.077	65
259.529	67.6
216.375	18.55
55.846	7
180.588	16.8
40.4	49.92
46.385	52.77
93.462	21.82
30.8	97.29
49	99.57
11.75	20.6
12.4	83.6
330.156	96.76
76.308	38.6
464.667	30.21
231.286	10.33
186.906	21.09
228.714	520.13
41	13
177.562	49.71
168.375	58.29
92.2	56
34.2	76.23
11.8	54.38
58.091	76.71
214.375	39.08
84.042	60.69
406	52.25
96.571	107.86
27.4	28
13.4	69.46
384.667	198.33
518.095	11
99.375	6.67
360.941	118.92
129.647	14.75
242.2	78.29
427.455	62.25
292.625	93.43
40.917	391.33
167.286	126.5
3.188	177.42
12.062	10.81
44.6	96.6
15.4	26.18
154.571	28
350.647	22.67
100	6.31
130.333	5.31
74.692	10
141.714	215
75	80.57
39.308	99.31
123.2	109.33
14.4	87.77
187.333	159.71
28.833	29
1529.5	7.88
90.077	277
51.2	9.38
20	46.33
37	159.38
176	451.38
26.625	27.75
90.857	253.5
23.2	639.88
265.13	172.5
101.421	34.09
36.542	73
23.818	306.42
102.333	146.86
82.667	93.65
33.385	16.91
74	274.53
91.842	23.8
18	21.75
49.583	7.13
37.091	152
42.909	123.14
1.875	90.69
10.667	63.33
50.286	145.62
36.708	69.25
202.211	66
133.211	42.83
64.714	109.75
37.4	82.73
33.6	95.75
99.656	167
26	777.8
42	41
125.842	122.23
352.614	922.45
315.391	267.67
42.769	20.6
12.2	19
129.059	92
15.667	120.43
104.8	168.53
13.8	138.62
15.182	10.44
5.188	9.67
33.8	41.31
8.625	38.63
38.469	102.5
73.143	70.67
19.231	59.38
19.6	120.6
211.429	541.29
134	56.5
32.636	58
311.211	98.69
12.25	1385.72
66.636	384.42
38.273	64.31
164	70.62
2720.36	140.15
30	377.88
1813.42	49.15
194.125	29.8
133	32.27
166.846	50.45
225.455	123.43
127.2	160.22
698.05	3.67
141.667	93.54
59.308	83.54
356	205.47
124.706	36.91
497.8	23.18
67.455	16
147	44.92
3600	37.14
105.9	119.85
58.5	126
59.1	24.55
93.3	58.71
56.8	102.5
7	101.95
135.7	17
24.9	16.6
21.5	12.33
204.4	6.75
170.5	149.15
194.6	46.21
112.2	45
12	32.96
11.2	14.36
703.3	14.67
147.5	4
18.3	39.67
74.5	20.8
255.8	30
176.1	8.63
460	249
13.5	52.38
170.5	69.73
433.9	64.23
84.6	107.58
233.5	29.25
243	81.41
22.8	3.94
24.8	7.33
763	16
41.5	34.92
23.5	11.67
87.4	10.33
217.4	11.2
346.6	34.83
100.4	4.75
489.2	2.38
285	103.29
430	64
185.4	7.36
1238.4	8.4
71.5	20
90	18
119.4	2.94
452.2	10.73
45.9	9.73
221.7	3.19
553.9	48.23
9.9	2.63
270.8	8.44
16.9	6
29.8	5.31
105.4	7.88
143.5	4.19
71.4	24.31
341.6	67
82.8	4.19
505.7	15.71
26.3	13.6
13.7	10.6
125	11.91
18.1	144.2
113	61.46
35.3	22.79
34.9	79.94
1293.6	39.5
145.4	23.55
56.2	10.4
1807.8	5.88
40.6	8.67
43.9	19.09
109.4	6.44
59.8	19.09
138.3	20
1418	68.67
63	83.86
283.4	18.55
697.8	19
519.4	86.71
34.3	15.25
48.7	85
112.4	19.8
481.4	131.2
96.7	54.92
182	27.8
471.3	70.92
331.5	71.03
451.2	187.2
652.9	9
80.2	47.96
196	78.69
179	54
426.4	60.8
310.6	21
141.7	732.72
818.1	17.33
94.7	9.38
40	42.08
235.1	928
172.1	79.65
22	7.19
182.3	13.67
28.3	175.83
275.8	38.6
96.9	22
454	45.77
618.4	4.69
44.8	39.69
662.6	58
597.4	93.41
51.2	62.66
307.3	70.71
136.5	73.06
69.1	70.43
268.5	32.8
746.1	75.35
828.6	23.25
541.6	16.63
328	102.33
25.7	236.4
19.1	257.5
45	38.4
70.7	80.67
544.2	110.74
49.7	13.6
39	6.88
254.1	4.19
225.9	15.36
1067	40.79
649.3	24.8
634.9	20.4
1322	16
37.2	73.5
1067.9	11.19
67.3	15.8
424.9	8.33
1486.8	1.94
519	32.23
200.8	25.75
26.2	30.92
507.8	4.88
250.4	13.6
228.3	13.64
94	22
49.7	3.19
57.4	5.67
85.1	49.86
86	12.6
830	31.67
71	1.33
23.5	11
792.1	5.25
13	229.29
115.4	11
62.3	75
23	15.2
198.5	19.57
157.1	22.17
167.1	5.67
42.3	96
932.7	5.19
752.5	43.62
95.3	4.88
1786.9	7.88
609.3	46.08
84.2	29
53.5	22.18
121.7	3.67
119.3	26
135.8	202.63
141.5	107
306.2	5.4
608.6	63
380.4	38.33
335.2	77.91
143.7	162
2243.4	16.36
306.2	425.75
104	104.35
342	276.2
967.6	23.55
873.6	45.2
99.6	126.29
158.6	9.33
845	42.71
263.6	81.94
545.4	155.19
694.2	18
677.8	33.15
16.7	40
158.9	96.33
1145.4	9.33
913.5	82
73.5	15.27
211.1	38.92
55.7	8.67
3046	164.4
193.6	42.92
1428.7	8.88
91.2	43.14
686.3	341
31.9	17.64
936.6	22.8
730.6	10.06
420	8.88
130.9	18.33
552	16.75
915.4	46.69
1052.5	4.06
207	15.8
1539	10
236.5	39.62
848	8.88
539.9	38.86
242.2	41.04
23.7	24.55
265.6	11
20.3	6.31
1729.7	18.2
72.2	14.2
5192	10.63
135.6	472.4
845	1867.75
490.8	28.18
26	12
6.9	7
5.6	961.8
46.8	26.92
211.7	7.25
67.8	33
51.9	20.18
668	435.4
10.9	62.31
40.4	41
57.5	10
43.1	0
20.7	5.31
22.7	13.4
534.4	38.25
8.8	2.2
60	20.18
13	4.5
82.7	1.5
458.6	7.67
7.3	9.8
20.7	42
175.2	88.33
88.4	9
37.2	14.27
165.2	29
18	17
30.8	22.75
119.8	10.69
23.6	63.46
12.7	16.25
104.2	51.69
18.4	113.8
41.8	26
38.3	35.45
12.4	11.69
72.7	31.75
17.8	54.77
66.3	166.79
293.5	123
26	111.8
45.5	76.37
31.7	9.19
25	14.73
170.6	32
181.7	143
12	87.4
11.4	10.4
124.6	45
22.2	33.33
15	35.46
155	86.5
40.7	46.29
14	14.91
321.1	0.94
64.9	16.45
12.7	44.2
3.9	10.6
7.9	45.5
6	79.25
11.3	18.45
18.9	78.69
3.3	50.15
113.3	10.8
37.3	58.6
782	120
222.8	5.44
151.6	19.64
40	79.25
29	23.27
223.2	209.69
342.7	11.67
11.3	10
304.6	18
46	14.6
540	56.2
36.1	83
1225.6	161.81
96.3	51.38
65.6	33.36
97.3	77.54
7.9	366.57
388.6	93
2273.8	22
1487.8	5.81
130.7	12.33
100.9	38.71
31.7	64
15.7	53.43
65.2	5.31
35.6	30.45
426.9	21.55
71.5	73.25
605.6	40
172.3	6
1035.4	67.77
33.2	17.33
102.3	31.92
21.1	36.91
553.6	8
79.6	9.67
342.4	14.6
25.6	57.15
82.1	234.77
118.7	97.33
567	137.5
245.5	2
444.9	29
679.2	9.5
746.5	11.25
699.8	87.5
416.2	42.96
293.6	7
331.6	32.23
43.6	11
615.5	112.71
111.1	10.4
289	54.89
121.7	119.35
124.1	6.4
45.8	239.5
222.3	18.6
130	17.38
67.6	92
478	16.27
279.8	7
26.9	17.4
87	52.86
56.9	162.9
165.5	35.46
177.3	7
115.6	49.38
213.6	15
10.9	129.5
952.8	122.6
19	6.6
197.3	27.64
27.8	6.06
177	53.54
298	70.05
6.4	24.83
114.3	2.67
13.7	173.25
440	5.94
1698.1	10
316.8	674.57
501.9	153.29
109.2	78.92
57.4	261.4
69.5	8
106.8	46.25
326.4	79
72.7	28
13.2	11.36
80.8	11
227.3	24.64
151.8	5.33
158.6	9.85
208.1	19.18
2352	42.85
7.3	5.75
76.8	88.7
56.7	18.82
156.2	5.19
188.7	4.69
62.9	11.09
32.8	34.67
478.6	92.2
350.3	52
48.9	43.15
121	22.54
48.8	25.79
47.2	13.2
117.7	5.5
241.7	13.55
175.3	16.4
519.5	7.75
34.4	21
56.4	5.88
17.4	19.2
116.4	27.71
112.8	16.45
26	17.8
8.3	7.33
141.5	10
58.9	6.06
156.4	51.57
126.3	8.33
395	39.38
40	52.15
157.8	12.67
65.7	164.94
12	60.38
20.3	26.09
128.4	69.63
233.4	108
96.4	19
23.7	159.5
161.6	18.2
371.3	13.67
226.1	13.33
65.7	152.45
123.4	26.91
25.2	12.67
31.6	9.44
90	78.67
75	105
188.2	18.6
49.4	164.33
85.8	7.2
73.9	15.6
69	124.41
129.8	63
1789.7	29.4
355.5	12.18
234.2	54.63
13.3	78.2
65	34.23
986	89
100	91.56
735	26.18
9.8	43.42
220.1	103.75
51	60.6
194	422.4
218.5	33.55
155.1	95
388.4	61.04
74.6	23.45
284.9	43
24.8	26.33
153.5	303.14
15.3	16.31
348.7	18.33
640	27
793.8	53.13
153.5	311.5
65.7	44.15
138.6	460.65
127.9	22
14	57.67
6.6	387.53
33.8	29.8
7.2	42.83
12	217.15
195.7	432.9
46.8	31.33
266.1	123
280.4	459.8
278	22
104.5	265.46
30.4	103.6
354.7	123.46
761.6	30.36
40	86.38
652.6	770.42
45.1	900.29
103	18.67
704.3	43.96
87.7	65.36
80.5	368
168.3	78.31
426.7	96.36
635.2	116.43
241.6	14.6
571.2	12.31
513.6	1149.29
50.8	215.92
129.5	288.14
37.6	92.54
135.6	187.94
108.5	20.8
86.5	324.33
37.5	87.57
1207.9	74.45
683.6	59.18
20.2	838
56.6	304.86
422	150.92
213.6	335.75
486.4	40.2
283.5	2.88
62.6	6.75
41.6	37.33
1272.9	523.5
1054.1	802.67
95.8	6.38
1385	24.2
147.3	28.91
7.6	478.56
184.4	29.82
160.1	64.25
44.4	85.57
332.2	121.06
167.5	92.62
436.2	117.86
92.2	41.04
80.8	99.5
87.9	31.92
849.3	15.67
169.7	101.6
807	25.29
446	41.23
92.3	11.67
304.2	187
170	6.75
410.3	12.36
10.8	65.6
434	24.18
266	1.38
288.2	96.28
107.8	37
224.3	16.33
127.6	117.2
270.6	104.43
192	49.5
160.8	18.91
78.6	1.69
253	31
1214.8	19
273.6	10.67
717.8	3.06
942.7	122.09
252.6	5.63
180.2	139.94
7.9	36.4
502.9	36.36
1129	124.88
534.7	54.85
713.1	224.5
472.1	10
1718.7	36.88
113	39.03
999.5	25.18
618.3	9.33
47	3.63
1262.5	17.8
140.1
441.8
299.5
771.3
253
233
246.9
1035.1
609.2
358
670.3
113.5
166.6
123.2
616.5
428.6
225.8
2471
1920.2
1461.1
3087
761
1728
849.4
57.8
129.4
178
172
685
593.2
144.6
251.8
126
73.8
13.6
15.8
15.4
7.9
14.3
83.5
90.7
186.1
214.3
116.9
27
52.3
191.6
314.3
136.8
432.8
345
185.3
56
23.5
27.4
29.6
149.2
268.5
160.4
124.8
810
79.9
72.5
106.8
124
165.8
555.2
28
33.7
50
15.8
214.5
100.5
24.5
102
164.4
362.7
140.9
356.9
52.3
28
140
142.2
490
934.5
89.2
65.8
196.6
54.7
19.7
37.9
411.6
106.5
234
71.3
28.2
37.8
24.4
399.7
91.8
18.2
2100.6
59.4
168
302.3
813.7
181.5
187.3
432.5
240.6
245.5
25.4
237.1
318.8
117.5
38.5
196.5
146.5
427.3
1474.8
220.4
88.4
207.5
66.8
16
165.4
2103.6
470.3
1423.9
86.5
112.3
228.7
189.7
389
680
560.8
82.3
348.8
530.8
2451
265.5
56.5
1733.3
2542.6
160.2
2886.9
227.6
540.2
276.6
765.5
74.8
65
1159.7
154.7
150.5
76.9
1581.3
285.5
892.4
911.7
55
2063.4
1327
203.4
236.8
22
473.6
264.4
85.1
215.4
45.1
445.6
121
285.8
250.4
560.4
741
1270.5
31.4
90
79.8
750.3
1306.3
456.4
3365.1
28.5
320.4
891.5
453
141.7
1038
3642.3
670.1
1882.8
1613
273.3
1257.8
643
28.5
2269.4
1038.8
997.3
1522
596
427.3
1092.2
438.7
1084.4
649
109
336.6
705.5
63.7
1114.7
2140.1
349.1
410.8
81.6
46.1
53.5
781.7
1026.3
610
162.8
289.6
35.8
259
17.6
191.6
82.4
167.8
19
60.1
119
266.2
80.8
304.5
177.8
128.5
289
310.9
122.6
20.7
60
143.1
31
877.5
827
72
50.4
582.4
314.4
603.3
449
1330.9
11.3
37.2
89.2
26.2
14.4
98.7
19.4
121.7
44.8
55.6
293.6
6.3
396.9
184.3
225.4
90
858.6
29.9
69.3
302.2
47.4
61.8
89.5
405.3
237.6
197
92
97.8
69.9
74.4
171.5
45
69.3
164.4
468.2
27.2
89.5
1083.5
127.5
374.1
1423.7
135.7
47
798.3
1559.3
54.6
44.5
109.6
1408.5
90
257
16.7
787
182.5
61
468.8
201.6
929.5
14.2
203.4
1001.6
328.4
346.3
278.3
220.4
1267.9
585.8
34.4
240.3
152.6
1364.5
723
580.8
2900.3
256
119
1316
366
164.4
105
178.3
213.5
105
68.7
583
265.5
264.9
788
13.3
261.7
1027
67.4
371
23.1
212.8
817.8
177.1
68.3
66.5
33.2
207.8
610.7
548.8
542.7
164.2
128.6
2799.6
323.2
349.2
280.9
349.5
112.8
122.2
57.8
50
43.3
16.3
84
102.3
53.3
168.8
69.3
631.5
13
187.1
192.6
355.9
1890.8
237.3
17.9
10.3
46.2
45.7
498.5
549.7
1345
15.6
571.2
389.7
936.8
481.7
397.3
207.3
1541.8
27.8
1185
725.6
335.3
1166.6
58.5
294.2
215.4
1801.8
430.5
2539.3
1278.8
575.5
313.2
1349
1285.3
631.1
1955
391
20.3
116.9
48.2
190.8
19.2
89.9
154
172.5
64
403
228.8
8.9
170.7
117.5
311
20.3
223.3
55.7
376.1
4402.8
1252
235.3
368.8
31.7
706.4
256
371
35.7
190
293.7
186.9
1086.3
103.5
134
671.2
214.2
126.6
577.2
287
745
127.3
91.8
35.7
214.7
647.4
35.3
329.1
1999.3
347
242.5
244.3
471.5
1356.1
1174.8
147.6
326.4
213
389.6
838.8
29.9
614.5
85.6
179.5
212.4
494.6
330.2
161.5
40.9
109.4
94.8
312.1
250.8
320
729.2
30.9
266.3
950.5
64.7
25.5
255.2
37.7
607.9
32.2
46.3
25
13.2
454.4
666.2
92.3
134.9
62
91.7
213
502.5
76.7
671.9
252.6
1372.4
576.9
268.6
184
45
980.7
295.9
1602.3
1065.1
257.7
546.1
40.8
45.6
243.6
152.6
234.4
97.9
130.3
26.1
181.6
37.6
90.8
331.6
63.2
238.2
949.4
40.3
274.3
775.6
1322.2
35.5
520.4
72.1
44.8
90.9
666
1307.3
429.3
8.9
14.4
29.9
29.4
4849.5
335.3
96.5
54.8
679.2
412.3
33.2
927
2544.4
145.2
934.7
275.9
140.4
565.3
184.9
179.1
1212.2
102.7
127.2
318.2
1861.4
279.8
428.4
328.2
17
91.5
254.2
283
388.5
30.7
337.5
8.8
998.1
125.1
132
654.8
11.2
87
412.6
102.2
[truncated: 868 more rows]
