# Supplementary material for: Ectocytosis prevents accumulation of ciliary cargo in C. elegans sensory neurons
Source: eLife journal article supplement (doi:10.7554/elife.67670), 2021-09-17
Supplement: supp [file Figure 8 - Source Data 1A and 1B.xlsx]

## Sheet: NaCl
line 3	plate 1	plate 2	plate 3	plate4
High	14	16	20	15
low	12	9	10	15
CI	0.0769231	0.28	0.333333	0
N2	plate 1	plate 2	plate 3	plate4
High	22	22	20	25		N2	line 1	line 2	line 3
low	1	5	6	2		0.913043	-0.304348	0.111111	0.0769231
CI	0.913043	0.62963	0.538462	0.851852		0.62963	-0.0769231	-0.157895	0.28
line2	plate 1	plate 2	plate 3	plate4		0.538462	-0.0967742	0.333333	0.333333
high	10	8	18	14		0.851852	-0.0666667	0.037037	0
low	8	11	9	13
CI	0.111111	-0.157895	0.333333	0.037037
line1	plate 1	plate 2	plate 3	plate4
high	8	12	14	14
low	15	14	17	16
CI	-0.304348	-0.0769231	-0.0967742	-0.0666667

## Sheet: CuSO4 
N2	plate 1	plate 2	plate 3	plate4
High conc CuSO4	21	20	22	22			N2	line 1	line 2	line 3
low conc CuSO4	8	5	0	3			0.448276	-0.04	0.0666667	0.142857
CI	0.448276	0.6	1	0.76			0.6	0.25	-0.0625	-0.0769231
Line1	plate 1	plate 2	plate 3	plate4			1	0.2	0.181818	-0.125
High conc CuSO4	12	15	18	9			0.76	-0.142857	-0.16129	0.357143
low conc CuSO4	13	9	12	12		Average	0.702069	0.0667857	0.00617363	0.0745192
CI	-0.04	0.25	0.2	-0.142857
line2	plate 1	plate 2	plate 3	plate4
High conc CuSO4	16	15	13	13
low conc CuSO4	14	17	9	18
CI	0.0666667	-0.0625	0.181818	-0.16129
line3	plate 1	plate 2	plate 3	plate4
High conc CuSO4	20	12	14	19
low conc CuSO4	15	14	18	9
CI	0.142857	-0.0769231	-0.125	0.357143
