# Supplementary material for: Ectocytosis prevents accumulation of ciliary cargo in C. elegans sensory neurons
Source: eLife journal article supplement (doi:10.7554/elife.67670), 2021-09-17
Supplement: supp [file Figure 8 - Source Data 1C.xlsx]

## Sheet: Sheet1
	IAA = 10ˆ-2 (1:100)		Replicate 1
			A (T1)	B (T2)	C (C1)	D (C2)	Total	Chemotaxis Index				A (T1)	B (T2)	C (C1)	D (C2)	Total	Chemotaxis Index
		N2	18	82	7	2	109	0.834862		N2	1	18	82	7	2	109	0.834862
		che-2	36	28	19	37	120	0.0666667			2	81	104	0	21	206	0.796117
		AMsh::DYN-1 (DN)_1	31	40	4	1	76	0.868421			3	59	172	27	3	261	0.770115
		AMsh::DYN-1 (DN)_2	61	22	0	5	88	0.886364									0.800365
		AMsh::DYN-1 (DN)_3	31	25	2	0	58	0.931034
												A (T1)	B (T2)	C (C1)	D (C2)	Total	Chemotaxis Index
										che-2 (e1033)	1	36	28	19	37	120	0.0666667
	IAA = 10ˆ-2 (1:100)		Replicate 2								2	9	6	8	5	28	0.0714286
											3	28	55	35	40	158	0.0506329
			A (T1)	B (T2)	C (C1)	D (C2)	Total	Chemotaxis Index									0.0629094
		N2	81	104	0	21	206	0.796117
		che-2	9	6	8	5	28	0.0714286				A (T1)	B (T2)	C (C1)	D (C2)	Total	Chemotaxis Index
		AMsh::DYN-1 (DN)_1	63	144	15	2	224	0.848214		AMsh::DYN-1(DN)_STR1	1	31	40	4	1	76	0.868421
		AMsh::DYN-1 (DN)_2	32	55	4	3	94	0.851064			2	63	144	15	2	224	0.848214
		AMsh::DYN-1 (DN)_3	109	65	10	2	186	0.870968			3	60	74	26	4	164	0.634146
																	0.783594
	IAA = 10ˆ-2 (1:100)		Replicate 3									A (T1)	B (T2)	C (C1)	D (C2)	Total	Chemotaxis Index
										AMsh::DYN-1(DN)_STR2	1	61	22	0	5	88	0.886364
			A (T1)	B (T2)	C (C1)	D (C2)	Total	Chemotaxis Index			2	32	55	4	3	94	0.851064
		N2	59	172	27	3	261	0.770115			3	16	57	7	2	82	0.780488
		che-2	28	55	35	40	158	0.0506329									0.839305
		AMsh::DYN-1 (DN)_1	60	74	26	4	164	0.634146
		AMsh::DYN-1 (DN)_2	16	57	7	2	82	0.780488				A (T1)	B (T2)	C (C1)	D (C2)	Total	Chemotaxis Index
		AMsh::DYN-1 (DN)_3	51	79	7	4	141	0.843972		AMsh::DYN-1(DN)_STR3	1	31	25	2	0	58	0.931034
											2	109	65	10	2	186	0.870968
											3	51	79	7	4	141	0.843972
		Control Only															0.881991
			A (C1)	B (C2)	C (C3)	D (C4)	Total	Chemotaxis Index
		N2	106	24	60	38	228	0.140351
		N2	47	51	26	166	290	-0.324138
