# Supplementary material for: Ectocytosis prevents accumulation of ciliary cargo in C. elegans sensory neurons
Source: eLife journal article supplement (doi:10.7554/elife.67670), 2021-09-17
Supplement: supp [file Figure 8 - Source Data 1D.xlsx]

## Sheet: Sheet1
		RAW NUMBERS							Population percentage
						Total # of animals
	Sections	1 (20-21)	2 (21-22)	3 (22-23)	4 (23-24)			Sections	1 (20-21)	2 (21-22)	3 (22-23)	4 (23-24)
	N2	47	104	227	493	871		N2	5.3961	11.9403	26.062	56.6016
	ttx-3	123	125	143	69	460		ttx-3	26.7391	27.1739	31.087	15
	DYN-1(DN)_STR 1	63	86	81	140	370		DYN-1(DN)_STR 1	17.027	23.2432	21.8919	37.8378
	DYN-1(DN)_STR 2	12	34	103	165	314		DYN-1(DN)_STR 2	3.82166	10.828	32.8025	52.5478
	DYN-1(DN)_STR 3	14	44	114	307	479		DYN-1(DN)_STR 3	2.92276	9.1858	23.7996	64.0919
