# Supplementary material for: Ectocytosis prevents accumulation of ciliary cargo in C. elegans sensory neurons
Source: eLife journal article supplement (doi:10.7554/elife.67670), 2021-09-17
Supplement: supp [file Figure 8 - Source Data 1E.xlsx]

## Sheet: Reversals upon stimulation
AMSH::dyn-1(DN) ; ASH::ChR2 [-TR]	AMSH::dyn-1(DN) ; ASH::ChR [+TR]	ASH::ChR2 [-TR]	ASH::ChR2 [+TR]
10	1	10	1
10	1	10	1
9	1	10	3
3	1	10	2
3	1	10	4
4	1	10	4
4	1	10	2
3	1	10	1
8	1	10	1
9	1	10	1
10	1	10	1
10	1	10	1
8	1	10	1
5	1	10	1
1	1	7	1
1	1	7	1
10	1	9	1
4	1	3	1
10	1	1	1
8	1	6	1
4	1	7	1
10	1	1	1
3	1	9	1
3	1	3	1
1	1	1	2
10	1	5	2
10	2	3	3
10	2	2	3
4	2	3	4
10	5	10	5
7	1	10	1
10	1	10	1
10	1	3	4
5	1	3	3
7	1	3	3
3	1	9	2
7	1	3	1
10	1	4	1
6	1	4	1
4	1	10	1
10	1	10	1
4	1	1	1
10	1	5	1
10	1	8	1
4	1	7	1
3	1	10	1
10	1	8	1
3	1	4	1
2	1	3	1
4	1	9	1
7	1	10	1
10	1	10	1
10	1	10	1
10	1	10	1
3	1	3	1
6	1	4	1
3	1	2	1
10	1	2	1
10	1	10	1
10	1	10	1
10	1	10	1
10	1	3	1
2	1	4	1
9	1	10	1
3	1	3	1
3	1	10	3
10	1	10	4
5	1	1	2
10	1	3	2
10	2	3	4
8	2	10	3
1	3	10	2
5	3	9	2
10	4	10	4
2	2	4	4
6	3	4	5
8	3	10	2
8	5	4	2
8	2	10	3
6	2	10	3
5	2		2
8	2		3
4	3		4
2	2		3
8
5
5
5
10
10
