# Supplementary figures and images for: Ectocytosis prevents accumulation of ciliary cargo in C. elegans sensory neurons
Source: eLife journal article supplement (doi:10.7554/elife.67670), 2021-09-17

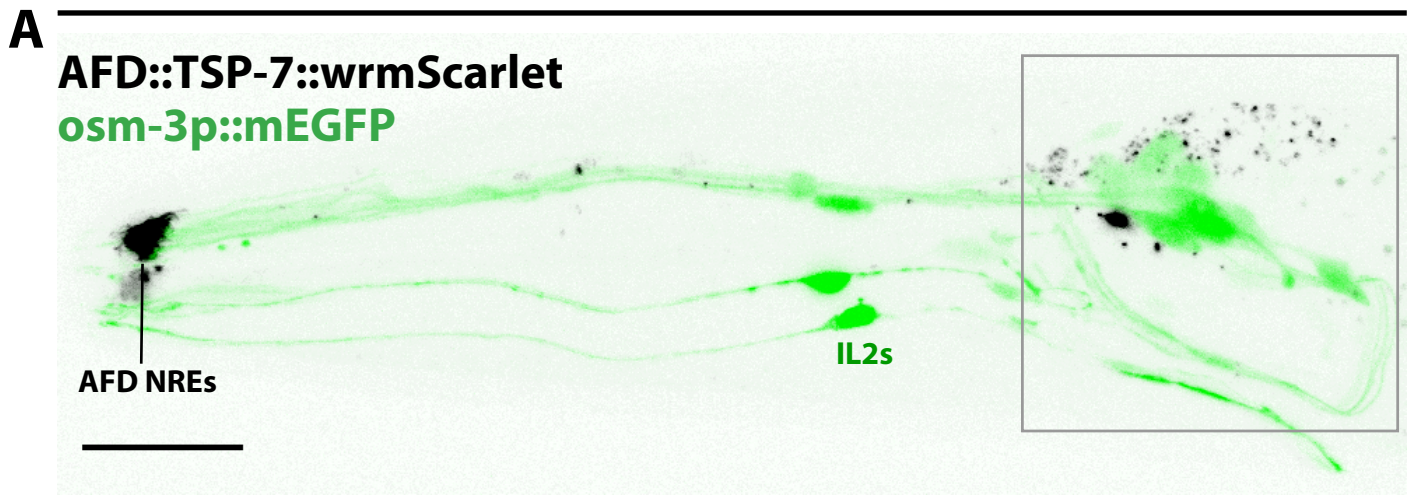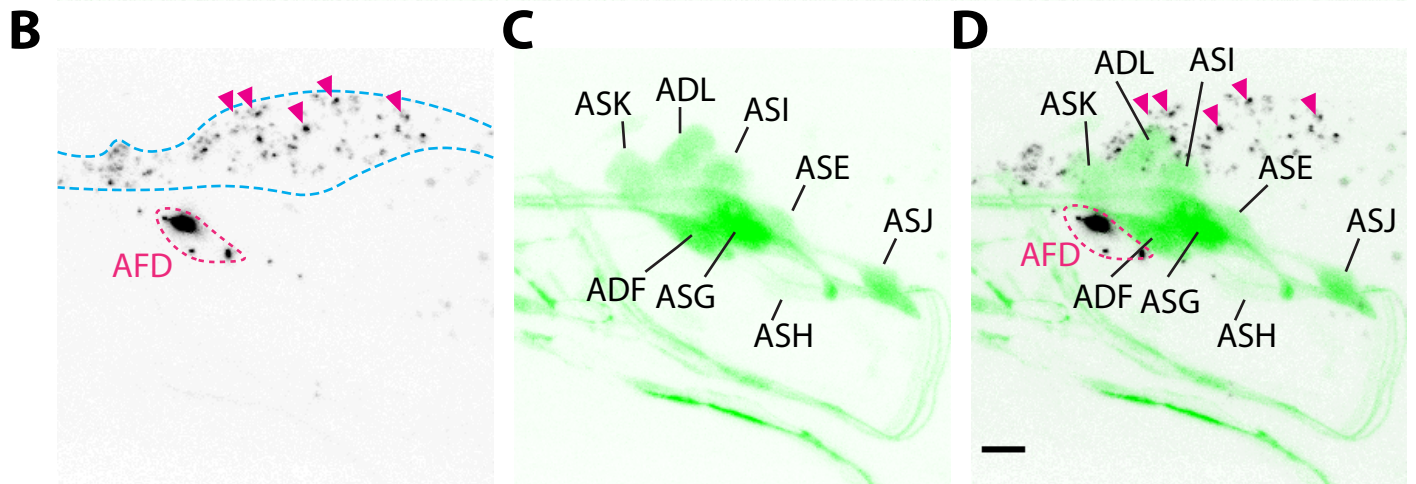**AMsh::DTA**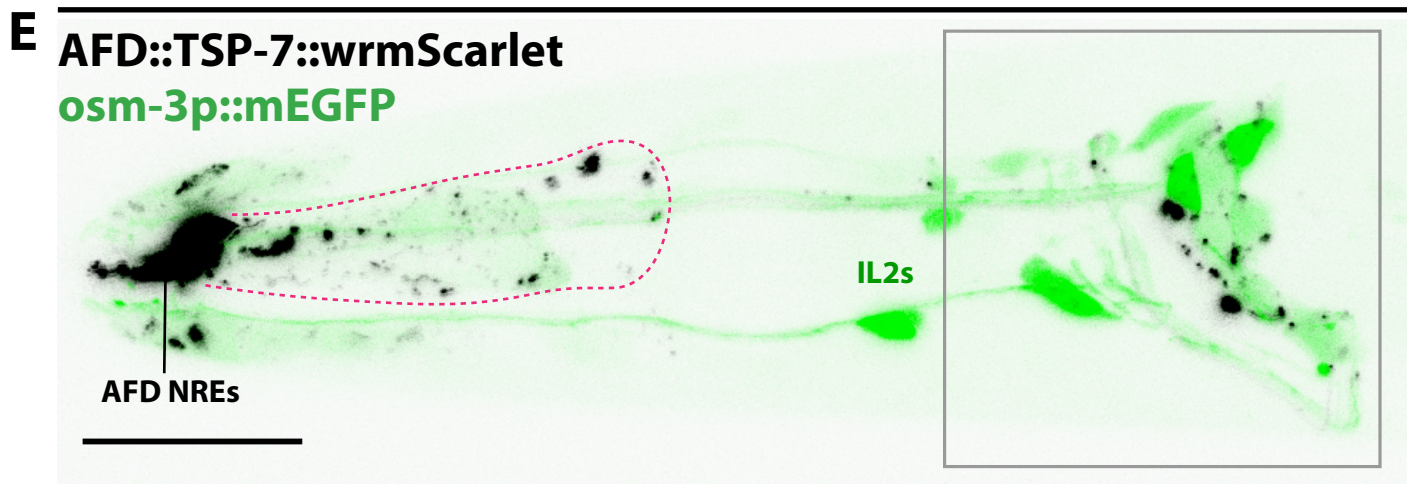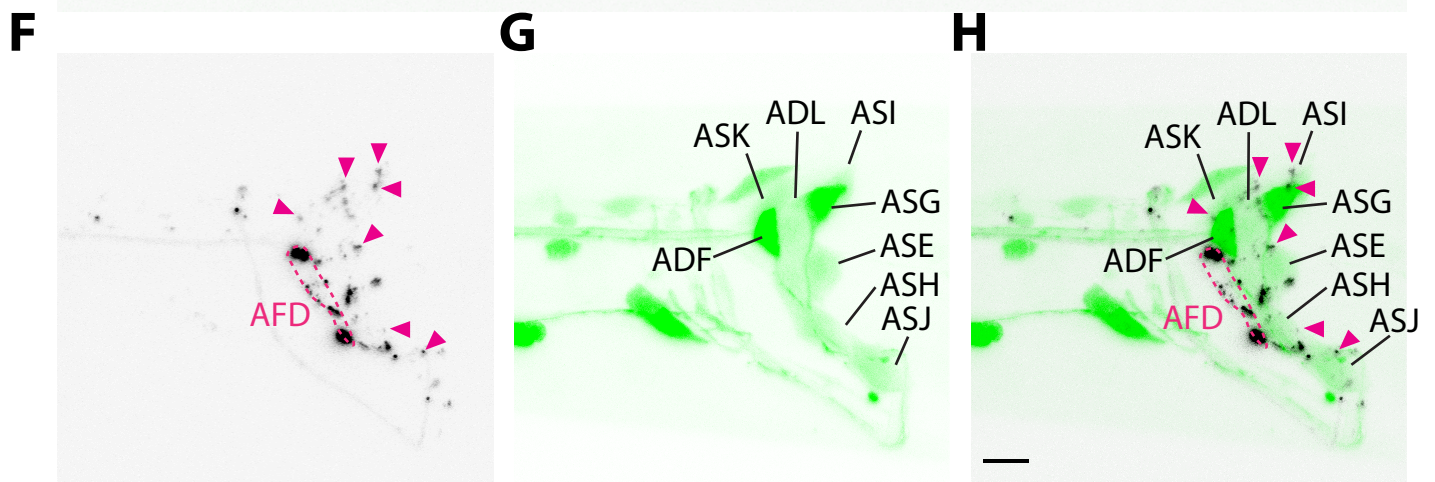

Supplement: supp [file elife-67670-supp-v1.zip]

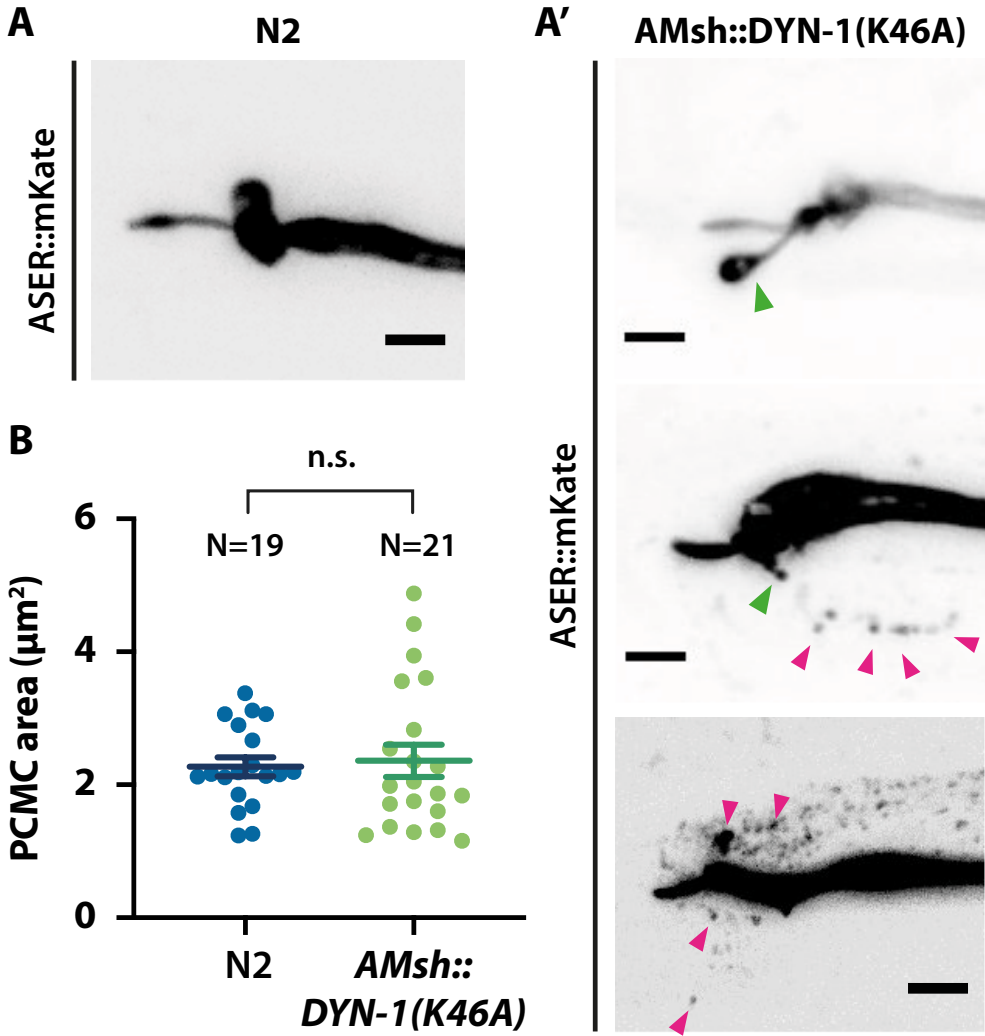

Supplement: supp [file elife-67670-supp-v1.zip]

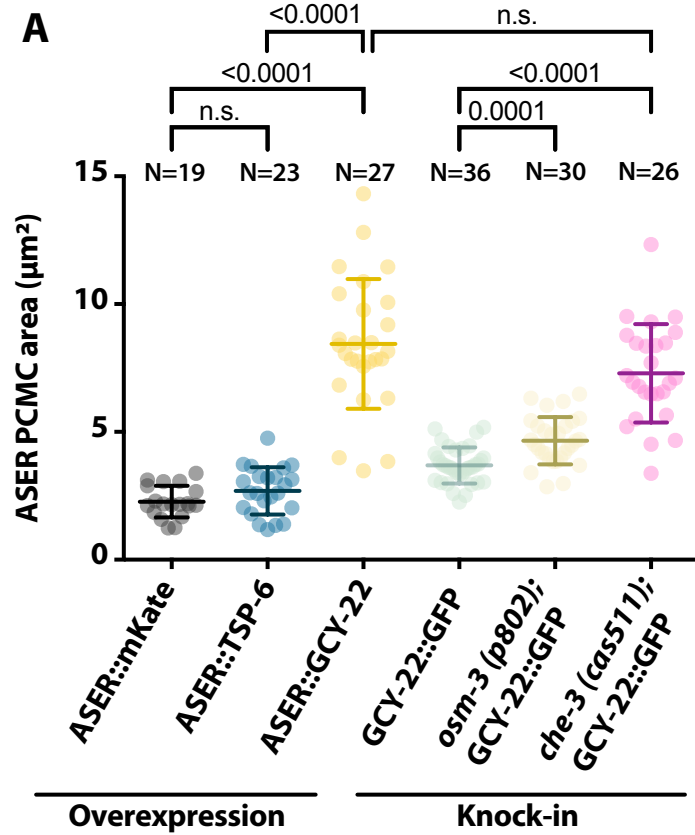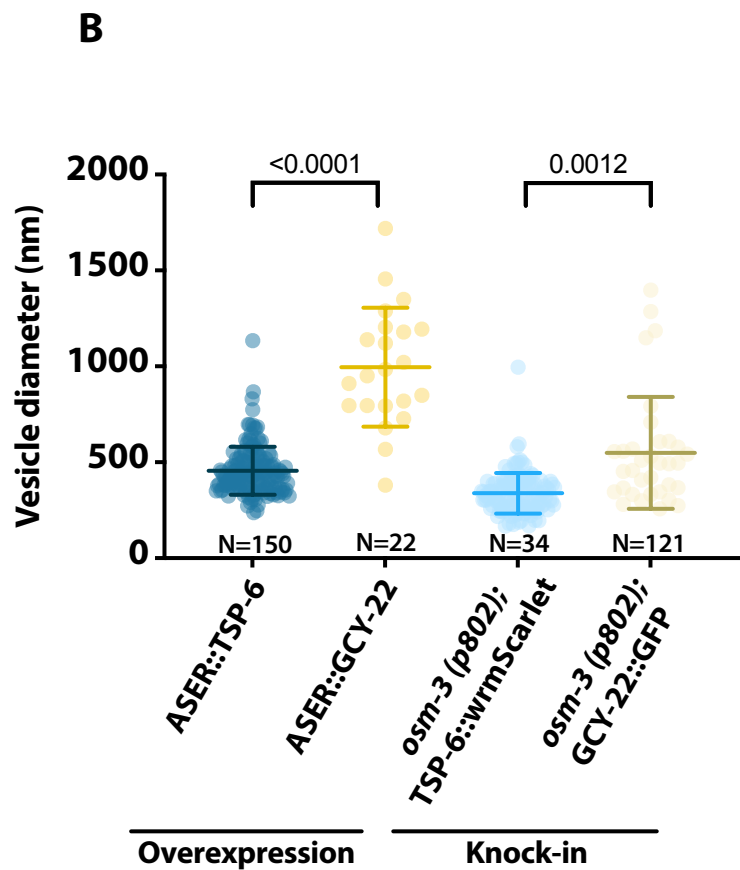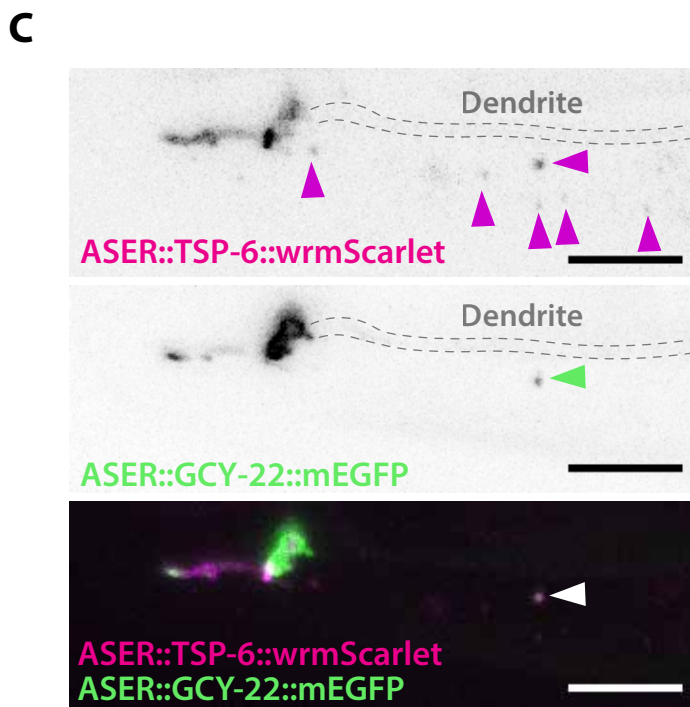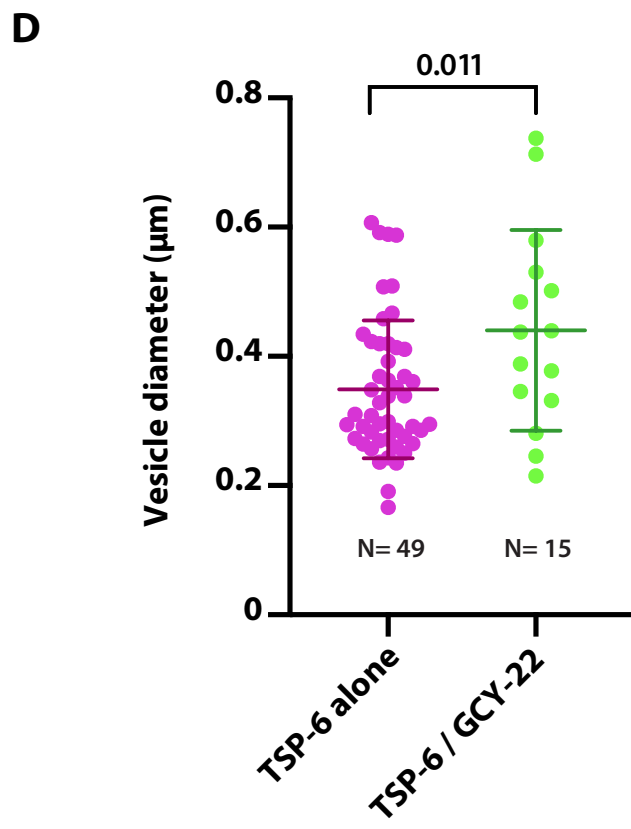

Supplement: supp [file elife-67670-supp-v1.zip]

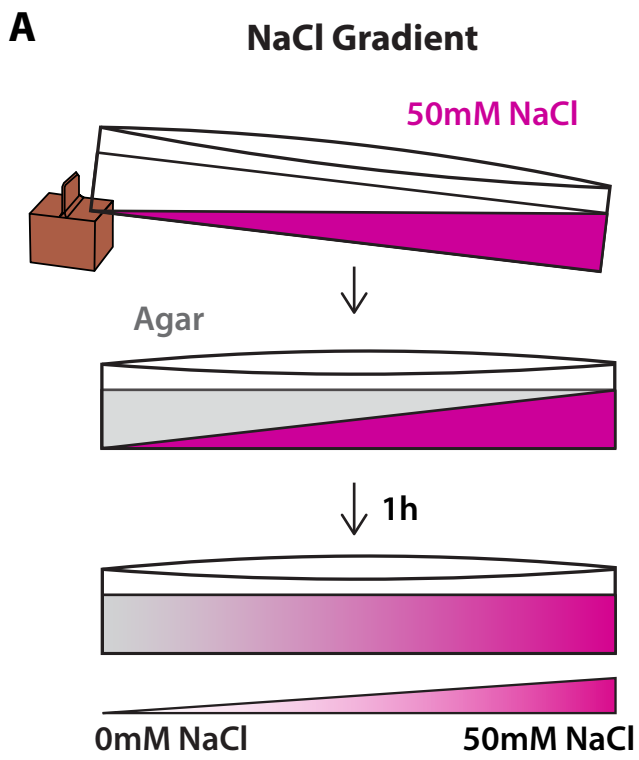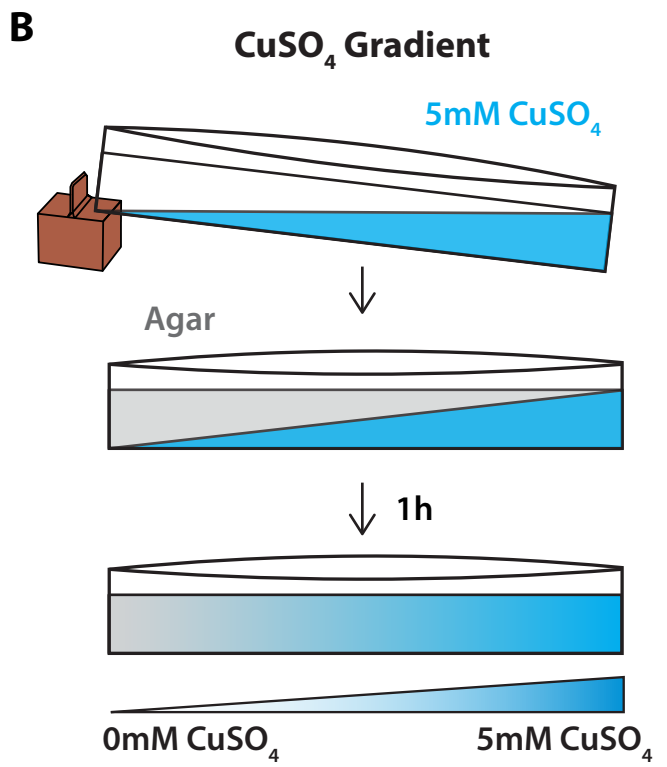

**C**

$$C.I. = \frac{(\# \text{ of animals in A}) - (\# \text{ of animals in B})}{\text{Total \# of animals in the plate}}$$

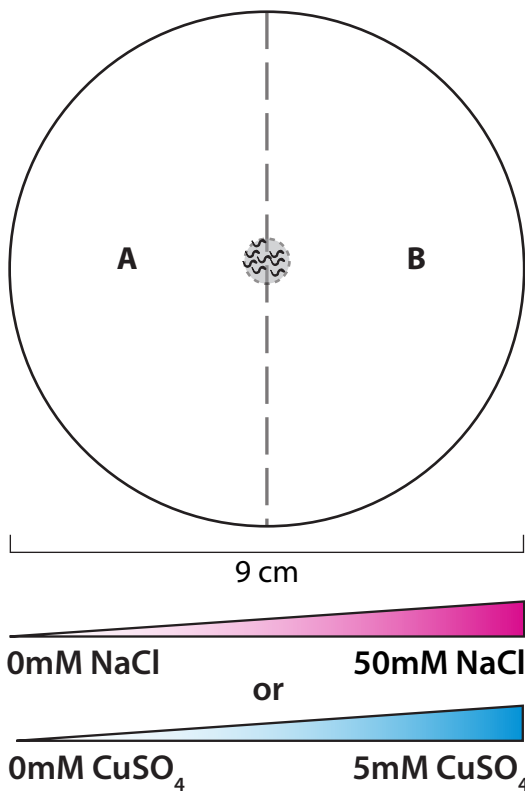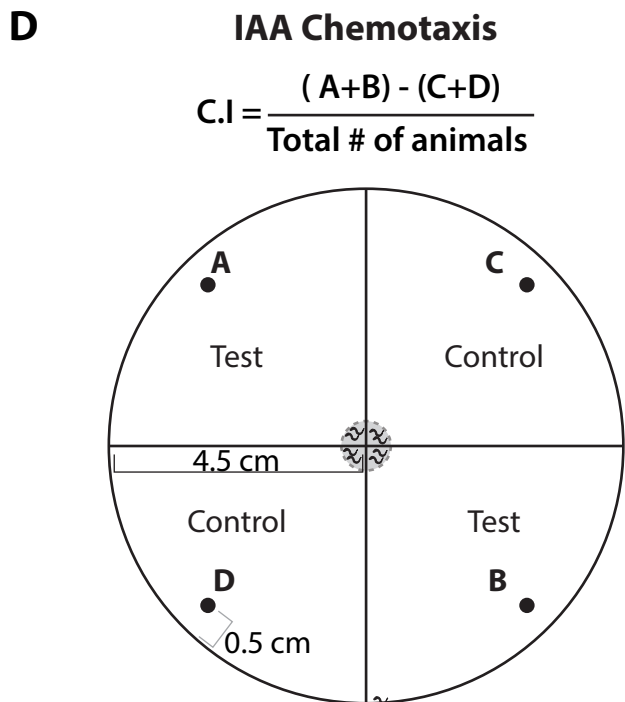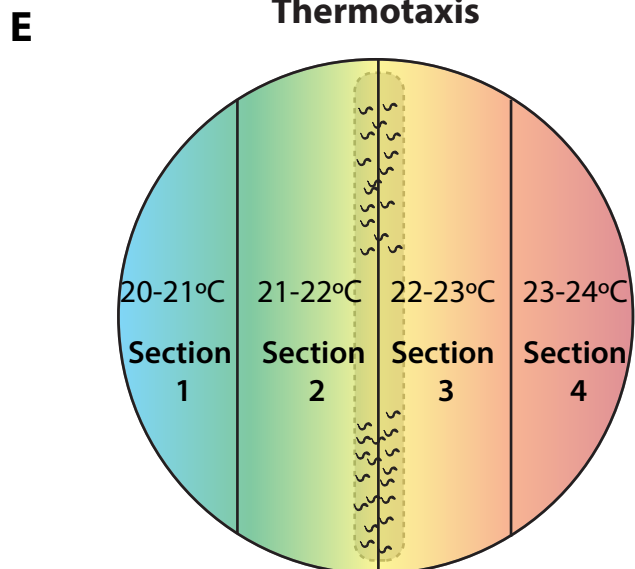

Supplement: supp [file elife-67670-supp-v1.zip]

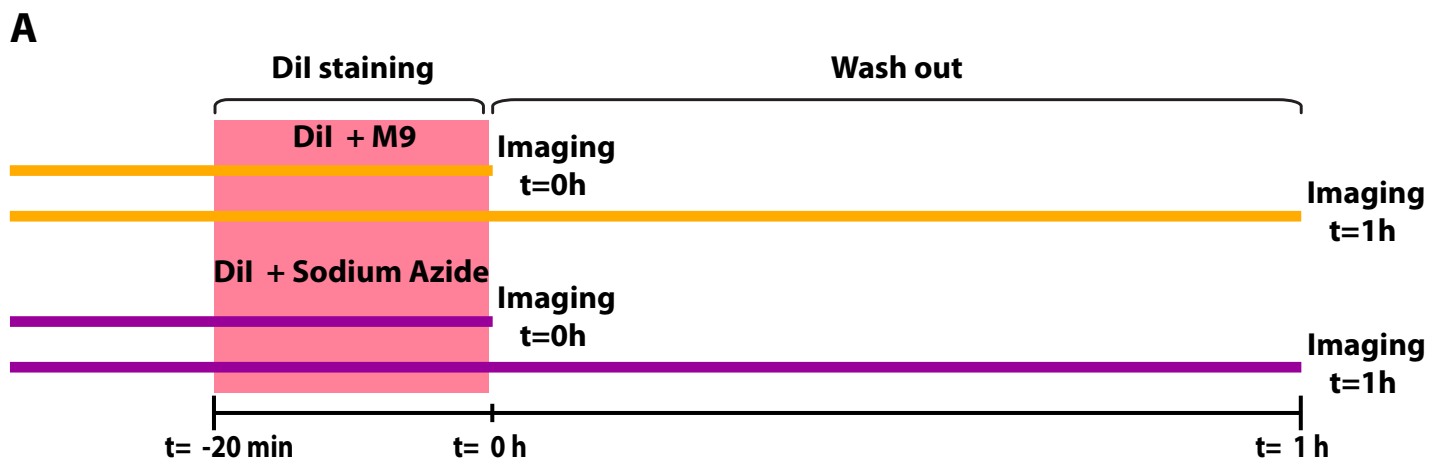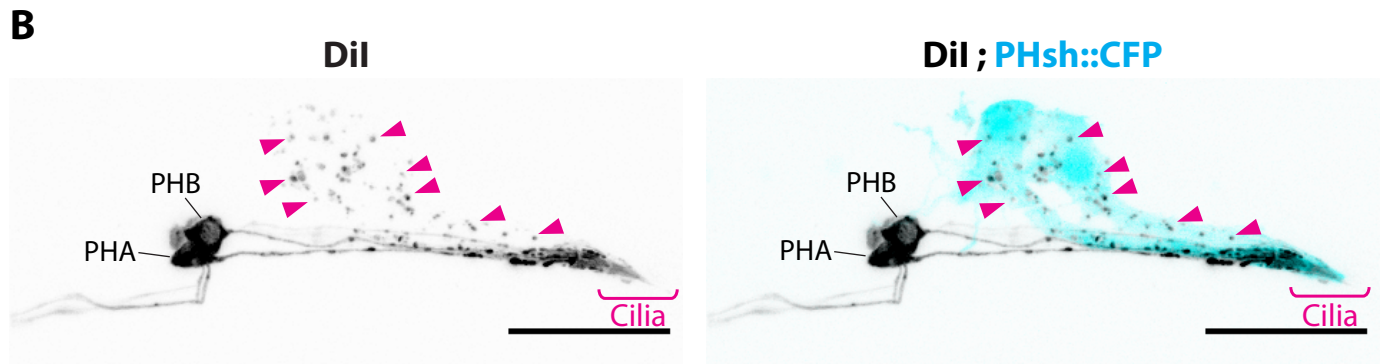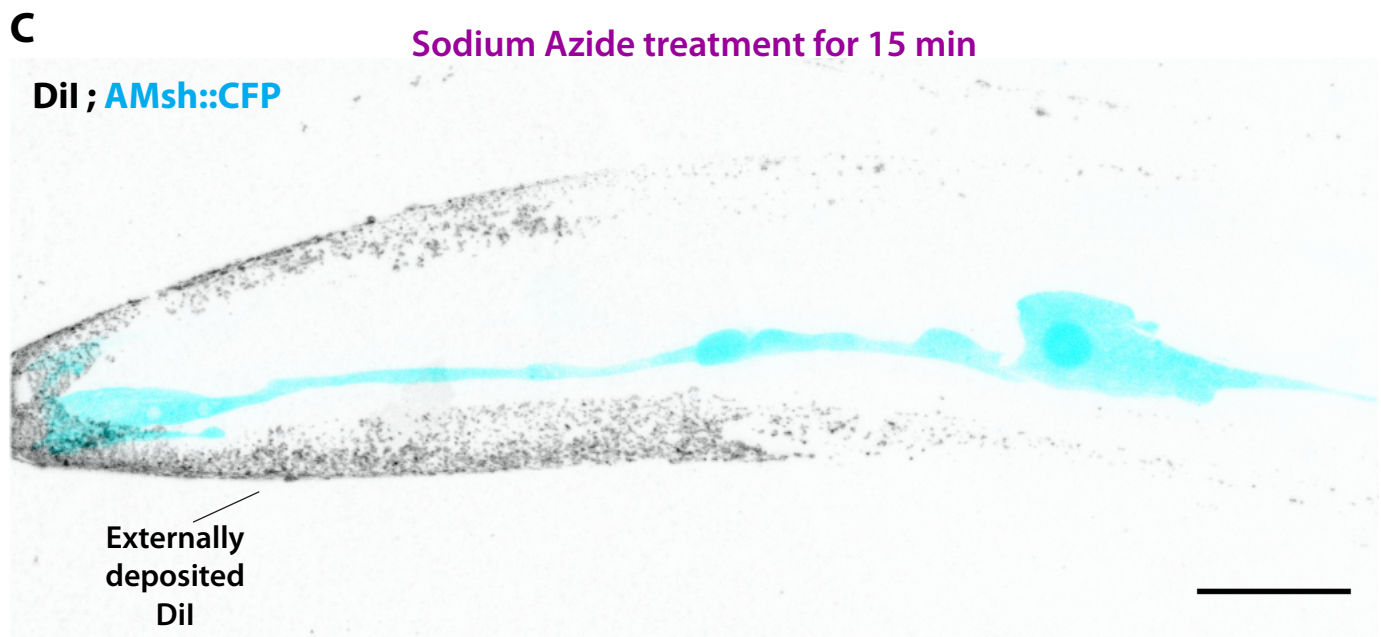

Supplement: supp [file elife-67670-supp-v1.zip]

**A**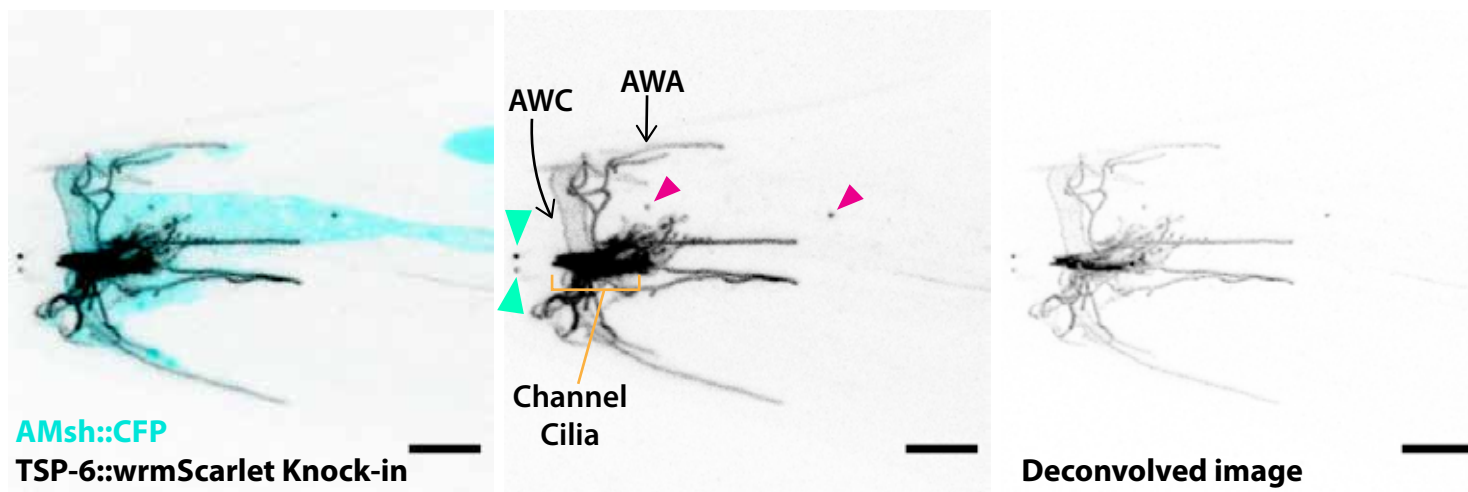**B**

|               | Lorenzo et al <sup>1</sup> |
|---------------|----------------------------|
| ASK           | 40.39                      |
| ADL           | 18.39                      |
| ASH           | 15.76                      |
| ASJ           | 13.74                      |
| ADF           | 11.89                      |
| ASG           | 11.04                      |
| AWC           | 5.21                       |
| AWA           | 5.21                       |
| ASI           | 3.47                       |
| ASER          | 12.35                      |
| ASEL          | 2.66                       |
| AQR, PQR, URX | 2.32                       |

**C**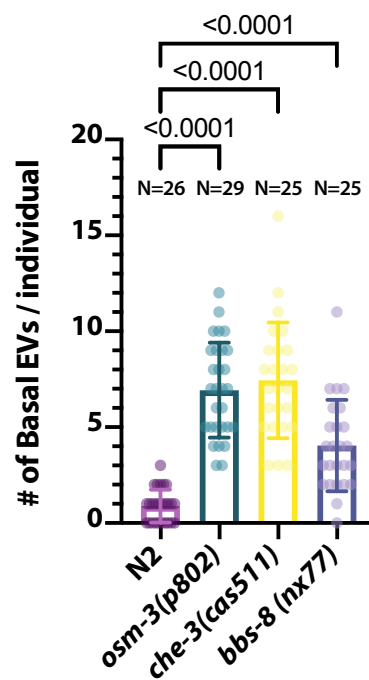**D**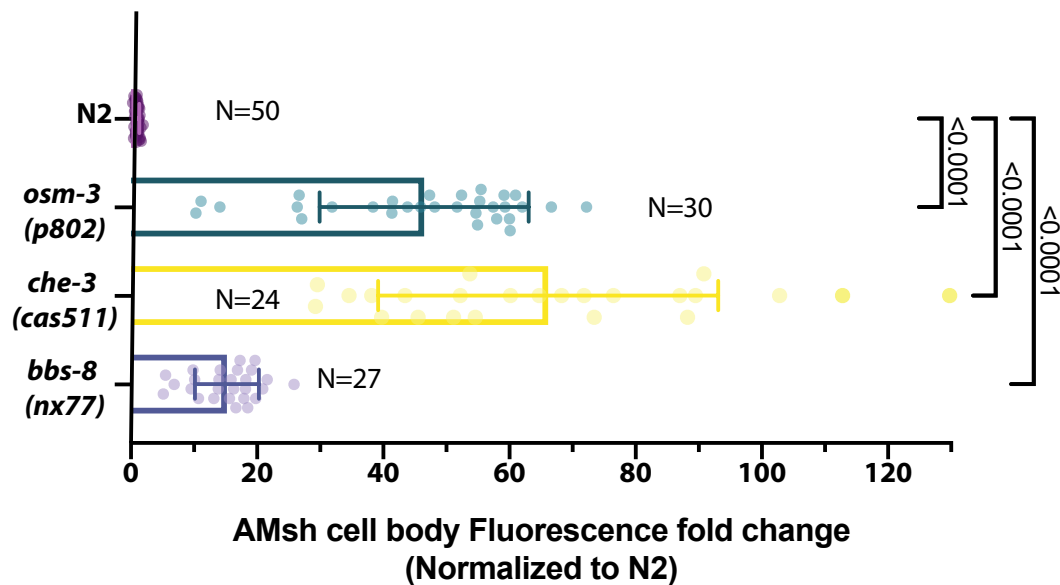

Supplement: supp [file elife-67670-supp-v1.zip]

**A**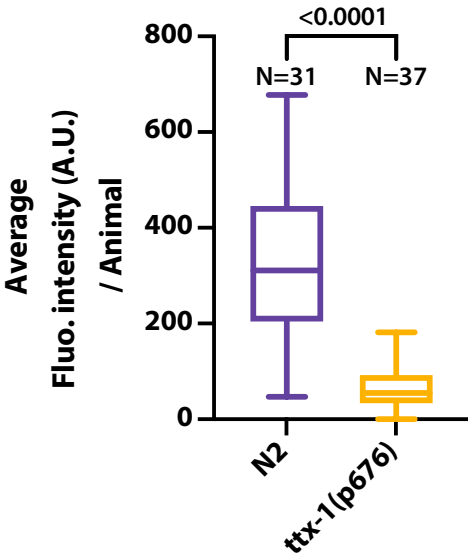**B**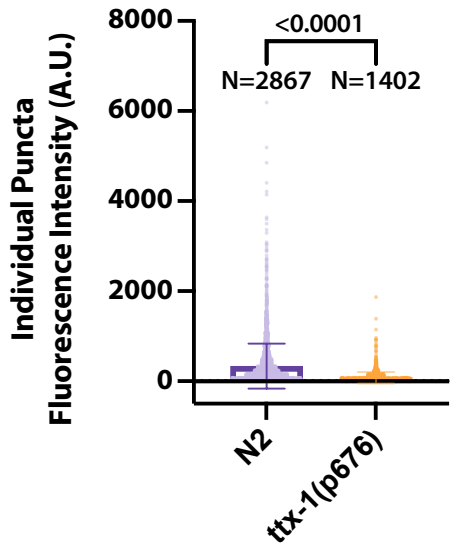

Supplement: supp [file elife-67670-supp-v1.zip]
